# Multiple horizontal mini-chromosome transfers drive genome evolution of clonal blast fungus lineages

A. Cristina Barragan<sup>1</sup>†\*, Sergio M. Latorre<sup>2</sup>‡, Angus Malmgren<sup>1</sup>, Adeline Harant<sup>1</sup>, Joe Win<sup>1</sup>, Yu Sugihara<sup>1</sup>, Hernán A. Burbano<sup>2</sup>, Sophien Kamoun<sup>1</sup>\*, Thorsten Langner<sup>1,a</sup>\*

<sup>1</sup>The Sainsbury Laboratory, University of East Anglia, Norwich Research Park, Norwich, UK

<sup>2</sup>Centre for Life's Origins and Evolution, Department of Genetics, Evolution and Environment, University College London, UK

<sup>a</sup>Current address: Max Planck Institute for Biology, 72076, Tübingen, Germany

†Authors contributed equally, \*Co-corresponding authors:

[anacristinabl@gmail.com](mailto:anacristinabl@gmail.com), [sophien.kamoun@tsl.ac.uk](mailto:sophien.kamoun@tsl.ac.uk), [thorsten.langner@tuebingen.mpg.de](mailto:thorsten.langner@tuebingen.mpg.de)

## Abstract

Crop disease pandemics are often driven by clonal lineages of plant pathogens that reproduce asexually. How these clonal pathogens continuously adapt to their hosts despite harboring limited genetic variation, and in absence of sexual recombination remains elusive. Here, we reveal multiple instances of horizontal chromosome transfer within pandemic clonal lineages of the blast fungus *Magnaporthe* (*Syn. Pyricularia*) *oryzae*. We identified a horizontally transferred 1.2Mb supernumerary mini-chromosome which is remarkably conserved between *M. oryzae* isolates from both the rice blast fungus lineage and the lineage infecting Indian goosegrass (*Eleusine indica*), a wild grass that often grows in the proximity of cultivated cereal crops. Furthermore, we show that this mini-chromosome was horizontally acquired by clonal rice blast isolates through at least nine distinct transfer events over the past three centuries. These findings establish horizontal mini-chromosome transfer as a mechanism facilitating genetic exchange among different host-associated blast fungus lineages. We propose that blast fungus populations infecting wild grasses act as genetic reservoirs that drive genome evolution of pandemic clonal lineages that afflict cereal crops.

**Keywords:** Clonal blast fungus lineages, crop disease pandemics, horizontal mini-chromosome transfer, wild hosts, genetic reservoirs

### 33 **Introduction**

34 Coevolutionary dynamics between plants and their pathogens date back millions of years and are a central  
35 force shaping both sets of genomes (Barragan and Weigel 2021). In such antagonistically interacting  
36 organisms, a cycle of adaptation and counter-adaptation must occur to avoid extinction (Van Valen 1973).  
37 This evolution relies not only on the acquisition of novel mutations but also on the preservation of long-  
38 standing genetic variation; together, these components provide the genetic foundations upon which  
39 selective pressures act (Nei 2007; Barrett and Schluter 2008). In eukaryotes, one of the major sources of  
40 genetic variation is recombination through sexual mating, yet many organisms, including fungal plant  
41 pathogens, preferentially reproduce asexually (Barrett 2010; Möller and Stukenbrock 2017). The absence  
42 of sexual recombination necessitates alternative mechanisms for generating genetic variability, including  
43 mutations, genomic rearrangements, transposon insertion, and gene duplication or loss (Seidl and  
44 Thomma 2014; Oggenfuss et al. 2023). However, these processes rely primarily on pre-existing genetic  
45 variation, and without the introduction of new genetic material, the adaptive potential of an asexual  
46 population is constrained. How clonal plant pathogens adapt to their hosts and avoid extinction despite  
47 harboring limited genetic variation is an important research question with practical implications, as clonal  
48 lineages of plant pathogens often drive disease pandemics in crops (Drenth et al. 2019).

49  
50 One mechanism for acquiring genetic variation which does not require sexual mating, is horizontal gene  
51 transfer (HGT). This process, consisting of the transmission of genetic material from a donor to a recipient  
52 organism within the same generation, is considered a major force in preventing extinction in asexual  
53 organisms (Takeuchi et al. 2014). In prokaryotes, HGT is well-established as a source of genetic diversity,  
54 occurring through known mechanisms such as conjugation, transformation, or transduction (Sun 2018).  
55 The prevalence of HGT in eukaryotes has also become more apparent in recent years (Gabaldón 2020),  
56 particularly within the fungal kingdom – one of the most extensively studied eukaryotic lineage (Fitzpatrick  
57 2012; Mohanta and Bae 2015; Sahu et al. 2023). In fungi, parasexuality, a mechanism enabling chromosome  
58 reassortment independent of sexual reproduction (Nieuwenhuis and James 2016), is a plausible avenue  
59 for HGT.

60  
61 Fungal genes acquired by HGT are often part of the non-essential accessory genome which is variable  
62 between individuals of the same species and contrasts to the core genome, which contains genes essential  
63 to housekeeping functions (McCarthy and Fitzpatrick 2019). This is in line with the “two-speed” genome  
64 model observed in some filamentous plant pathogens (fungi and oomycetes), where indispensable genomic  
65 regions are under higher evolutionary constraints and may appear as slow-evolving, while variable genomic  
66 regions are under more relaxed constraints or positive selection, and can appear as rapidly-evolving (Dong  
67 et al. 2015). Rapidly-evolving or dynamic genome compartments are characterized by the presence of  
68 virulence genes, high sequence diversification, presence/absence variation, structural changes, and  
69 segmental duplications (Torres et al. 2020; Huang et al. 2023). An extreme form of structural variation  
70 are mini-chromosomes (mChr), also referred to as supernumerary, accessory, or B chromosomes, which  
71 exist in addition to core chromosomes and have been found in 15% of eukaryotic species (Covert 1998).  
72 While mChr emergence has been associated with genomic rearrangements at repeat- and effector-rich  
73 subtelomeric ends of core chromosomes (Bertazzoni et al. 2018; Peng et al. 2019; Langner et al. 2021;  
74 van Westerhoven et al. 2023), the exact molecular mechanism remain an area of ongoing investigation. By  
75 being physically unlinked from core chromosomes, mChr can diversify rapidly and could serve as a cradle  
76 for adaptive evolution without compromising genomic integrity (Croll and McDonald 2012).

77 The adaptive role of mChr in plant pathogenic fungi is underpinned by their correlation to virulence in  
78 various pathogen-host systems (Miao et al. 1991; Kistler 1996; Han et al. 2001; Akagi et al. 2009; Ma et al.  
79 2010; Chuma et al. 2011; Balesdent et al. 2013; van Dam et al. 2017; Habig et al. 2017; Bhadauria et al.  
80 2019; Henry et al. 2021; Asuke et al. 2023). In addition, variation in virulence has been partly attributed  
81 to the horizontal transfer of mChr (Mehrabi et al. 2011). This is exemplified in the case of *Fusarium*  
82 *oxysporum*, where the horizontal acquisition of a mChr in laboratory settings transformed a non-  
83 pathogenic strain into a virulent pathogen (Ma et al. 2010). Similarly, in the insect pathogen *Metarhizium*  
84 *robertsii*, strains with a horizontally acquired mChr were more virulent compared to those without this  
85 mChr (Habig et al. 2023).

86  
87 A notorious plant pathogenic fungus where asexually reproducing clonal lineages underlie crop pandemics,  
88 is the blast fungus *Magnaporthe oryzae* (Syn. *Pyricularia oryzae*) (Latorre et al. 2020; Latorre et al. 2023).  
89 The blast fungus is one of the most devastating plant pathogens worldwide and is the causal agent of blast  
90 disease in dozens of wild and cultivated grasses (Islam et al. 2023). As a species, *M. oryzae* is differentiated  
91 into genetic lineages that tend to be host-associated, with occasional gene flow observed between certain  
92 lineages (Couch et al. 2005; Gladieux, Condon, et al. 2018). The highly destructive rice blast fungus lineage  
93 reproduces mostly asexually in nature, with limited traces of sexual reproduction having been found (Saleh  
94 et al. 2012; Thierry et al. 2022). Nevertheless, the rice blast fungus lineage remains genetically isolated,  
95 with no gene flow detected from other *M. oryzae* lineages so far (Gladieux, Condon, et al. 2018). To date,  
96 three globally prevalent clonal lineages affecting rice and one affecting wheat have been identified as the  
97 underlying cause of persistent blast pandemics (Latorre et al. 2020; Latorre et al. 2023). Despite their  
98 restricted genetic diversity, clonal *M. oryzae* lineages readily evolve to counteract host defenses, posing a  
99 challenge to the development of durable blast-resistant crop varieties (Younas et al. 2023). The mechanism  
100 that allows clonal blast fungus populations to adapt to new host germplasm, despite an apparent lack of  
101 avenues for genetic innovation, remains elusive.

102  
103 Structural variation in both mChr and core chromosomes contribute to genomic diversity in the blast  
104 fungus (Talbot et al. 1993; Orbach et al. 1996). Recent genomic analysis of a wheat blast fungus isolate  
105 revealed multi-megabase insertions from a related species, suggesting HGT (Kobayashi et al. 2023). In  
106 addition, the postulated horizontal transfer of the avirulence gene AVR-Pita2 among related species to the  
107 blast fungus substantiates the hypothesis that HGT is occurring (Chuma et al. 2011). While these instances  
108 highlight HGT as a possible driver of genetic variation in the blast fungus, the exact mechanisms facilitating  
109 HGT remain unclear. In addition to gene transfer, mChr have been associated with virulence gene  
110 reshuffling and recombination with core chromosomes (Kusaba et al. 2014; Peng et al. 2019; Langner et  
111 al. 2021; Asuke et al. 2023; Gyawali et al. 2023), indicating that horizontal mChr transfer could be  
112 instrumental in driving genomic innovation.

113  
114 In this study, we provide evidence for multiple horizontal mini-chromosome transfer events involving  
115 clonal lineages of the rice blast fungus *M. oryzae* that occurred under field conditions. We identified a  
116 1.2Mb supernumerary mini-chromosome, mChrA, which is remarkably conserved across *M. oryzae*  
117 isolates from lineages infecting the wild host species, Indian goosegrass (*Eleusine indica*), and rice. We show  
118 that mChrA was acquired by clonal rice blast fungus lineages through at least nine independent horizontal  
119 transfer events over the past three centuries. This establishes horizontal mChr transfer as a naturally  
120 occurring genetic exchange mechanism among different host-associated blast fungus lineages. Our findings

121 lead us to propose that blast fungus lineages infecting wild grasses serve as genetic reservoirs, driving  
122 genome evolution of pandemic asexual clonal lineages that afflict crops.

123

## 124 **Results**

### 125 **Clonal rice blast fungus isolates display variable mChr content**

126 We have previously shown that genetically diverse *M. oryzae* isolates exhibit variable mChr content  
127 (Langner et al., 2021). Here, we set out to analyze the extent to which mChr variation contributes to  
128 genomic diversity in a set of genetically related isolates belonging to a single clonal lineage. To this end,  
129 we selected nine rice blast fungus isolates collected from Italy (Win et al. 2020) (**Fig S1A** and **Table**  
130 **S1**). Using genome-wide single-nucleotide polymorphism (SNP) data we confirmed that the nine isolates  
131 belong to a single clonal lineage (clonal lineage II), which is predominant in Europe (Latorre et al. 2020;  
132 Thierry et al. 2022) (**Fig 1A, S1B** and **Table S2**).

133

134 To determine the karyotype of the selected isolates, we performed contour-clamped homogeneous  
135 electric field based (CHEF) electrophoresis. This revealed variable numbers and sizes of mChr, with each  
136 isolate exhibiting one to four mChr, each varying from 0.5 to 2Mb in size (**Fig 1B** and **1C**). To genetically  
137 characterize individual mChr, we performed mini-chromosome isolation sequencing (MCIS) on all  
138 eighteen mChr found across the nine isolates (Langner et al. 2019; Langner et al. 2021). Reads obtained  
139 from each individual mChr were mapped to the reference assembly corresponding to its originating  
140 isolate. Contigs exhibiting high MCIS coverage and high repeat density, a characteristic trait of mChr, and  
141 were <2Mb in size, were identified as mChr contigs (**Fig S2, S3, Table S3** and **S4**).

142

143 Next, we compared mChr contigs across the studied clonal isolates. Reciprocal sequence homology  
144 searches revealed the presence of a conserved 1.7Mb mChr (mChrC) in eight out of the nine isolates.  
145 mChrC corresponds to a previously identified mChr found in the rice blast fungus isolate FR13, which  
146 also belongs to clonal lineage II (Langner et al. 2021). We aligned mChrC contigs and confirmed high  
147 synteny across isolates (**Fig 1D**). To obtain an overview of how common mChrC is in the global *M.*  
148 *oryzae* population, we examined the presence of this sequence across 413 *M. oryzae* and *Magnaporthe*  
149 *grisea* isolates (**Table S5**). We performed short-read mapping to the AG006 genome, known from  
150 karyotyping to possess the highest mChr diversity. Subsequent breadth of coverage calculations (see  
151 Methods) revealed that mChrC is particularly conserved among rice blast fungus isolates, especially those  
152 belonging to clonal lineage II (**Fig S4A-C** and **Table S6**).

153

154 *M. oryzae* isolate AG006 stood out within the examined set of isolates as it contained three additional  
155 mChr named mChrS, mChrA, and mChrM, in addition to mChrC. These mChr exhibited sizes ranging  
156 from 0.97 to 2Mb. Notably, the largest of these mChr, which we termed the mosaic mini-chromosome  
157 (mChrM), was composed of segments derived from the three smaller mChr, namely, mChrC, mChrA,  
158 and mChrS (**Fig 1B, 1C, 1E** and **S2**). The presence of this mosaic mChr reveals that recombination  
159 among mChr occurs, and plays a role in generating novel genetic combinations.

160

161 Upon closer examination of mChrA, we found it exhibited low sequence similarity to the genomes of the  
162 other Italian isolates, as evidenced by reciprocal sequence homology searches (**Fig 1B, 1C, 1E** and  
163 **Table S7** and **S8**). There were two exceptions to this, a duplicated fragment within mChrM (**Fig 1E**),  
164 and a small 0.1Mb contig (AG006\_Contig17) which aligned to a specific region of mChrA

175 (AG006\_Contig10) (**Fig S3A**). The latter may have originated from a sequence duplication event or be  
 176 an assembly artifact. mChrA displayed high MCIS coverage and canonical telomeric repeats at both ends,  
 177 indicating it is linear and largely assembled into a single contig (**Fig S5**). Lastly, to reinforce these findings,  
 178 we conducted a whole-genome alignment between AG006 and AG002, an isolate genetically highly similar  
 179 to AG006 (**Fig S1B**), confirming the absence of mChrA in AG002 (**Fig 2F**).  
 180  
 181

171 Taken together, we found high mChr diversity in a collection of nine clonal rice blast fungus isolates.  
 172 Remarkably, we identified a unique mChr, mChrA, which does not display sequence similarity to the other  
 173 nine rice blast fungus isolates. This finding underscores the unique genetic variation present even among  
 174 closely related blast fungus isolates.

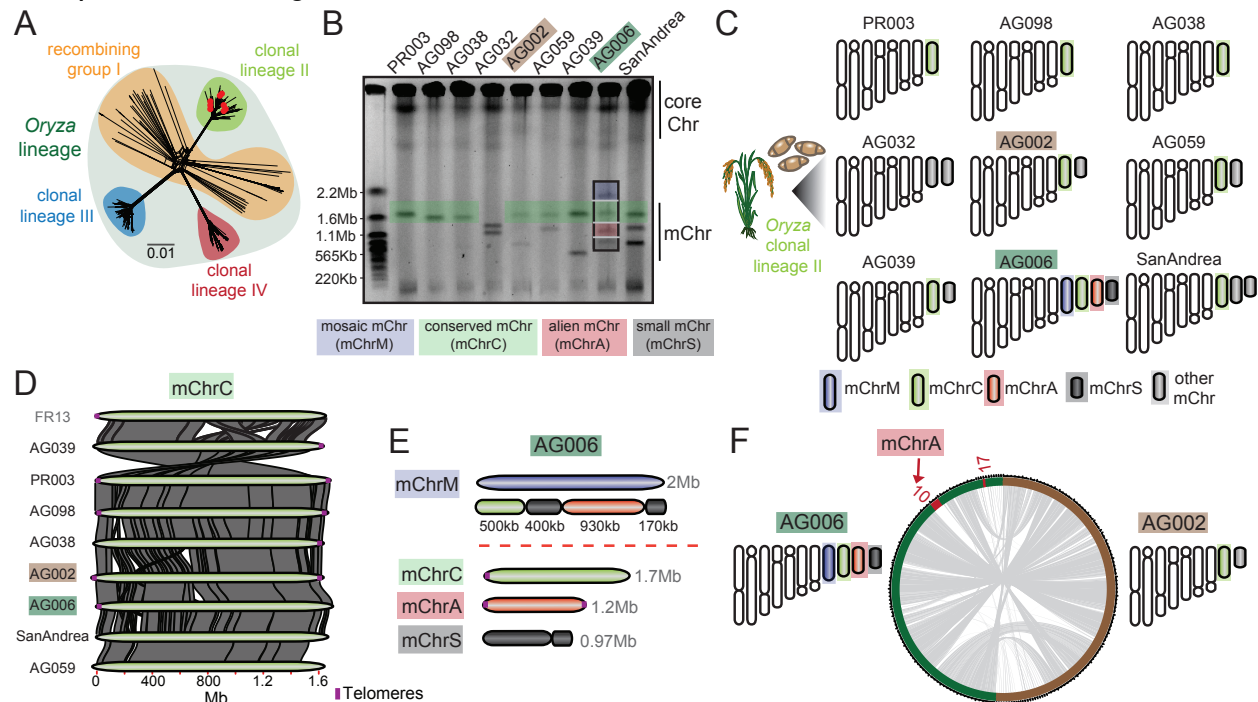

**Fig 1. Clonal rice blast fungus isolates display variable mChr content.** **A.** Genome-wide SNP-based NeighborNet analysis confirms the nine rice blast fungus isolates (red dots) belong to clonal lineage II (green) (Latorre et al. 2020). **B.** CHEF gel karyotyping reveals variable mChr content. A conserved 1.7Mb mChr (mChrC, green) is found in eight of nine isolates. A 2Mb mChr (mChrM, blue), present in isolate AG006, is a mosaic composed of fragments from three other mChr (mChrC, mChrA, and mChrS; see panel E) from the same isolate. A third 1.2Mb mChr (mChrA, red) found in AG006, is absent from the genomes of the other isolates (see panels E and F). **C.** Schematic karyotype of Italian isolates. Core chromosomes are shown in white. mChr studied in detail are highlighted in colors, while the rest are in gray. **D.** mChrC exhibits high synteny across isolates and is also found in isolate FR13 (Langner et al. 2021). Telomeric sequences are indicated by a vertical line (purple). **E.** Inferred mChrM sequence composition. **F.** Whole-genome alignment between AG006 (green) and AG002 (brown). mChrA (AG006\_Contig10) and AG006\_Contig17 (in red) are absent from AG002.

### mChrA sequences are present across multiple host-associated blast fungus lineages

188 To determine the origin of mChrA, we assessed the presence of the mChrA sequence (AG006\_Contig10)  
 189 across a set of 413 *M. oryzae* isolates belonging to ten different host-associated lineages and to *M. grisea*  
 190 (**Fig 2A** and **Table S5**). For this purpose, we calculated the breadth of coverage for mChrA  
 191 (AG006\_Contig10) in each isolate, and observed it followed a bimodal distribution (**Fig 2B**). Model-based  
 192 clustering established 126 isolates as mChrA carriers (**Fig S6A-B** and **Table S9**, see Methods). These  
 193 isolates belonged to six different host-associated *M. oryzae* lineages (**Fig 2A, B** and **S6D**). Notably, only  
 194



195 12% of rice blast fungus isolates (32 of 276) were identified as mChrA carriers (**Fig 2A, B** and **Table**  
 196 **S9**). These rice blast fungus isolates were genetically diverse, belonging to all three clonal lineages and the  
 197 recombining group (defined here as *Oryza* subgroups) (**Fig 2C** and **S6E**).

198  
 199 In contrast to rice blast fungus isolates, the mChrA sequence was common across isolates belonging to  
 200 the *Lolium* and *Triticum* lineages, with most isolates carrying 80-90% of the mChrA sequence (**Fig 2B** and  
 201 **S6D**). Previous karyotyping and sequencing efforts identified isolate B71 from the *Triticum* lineage and  
 202 isolate LpKY97 from the *Lolium* lineage to carry mChr (Peng et al. 2019; Rahnama et al. 2020). Given that  
 203 these isolates also carry a substantial portion of the mChrA sequence (79% and 87% mapping to mChrA  
 204 in AG006, respectively), it suggests that the mapped mChrA sequences may share a common ancestry  
 205 with the mChr in these two isolates. However, the most striking sequence identity was observed in two  
 206 isolates from the *Eleusine* blast fungus lineage, Br62 and B51. These exhibited mChrA coverage comparable  
 207 to the rice blast fungus isolate AG006, suggesting high similarity in the mChrA sequences between these  
 208 isolates (**Fig 2B** and **Table S6**). Taken together, mChrA sequences were found in blast fungus isolates  
 209 belonging to six different host-associated lineages, with members of the *Eleusine* and *Oryza* lineages  
 210 carrying nearly identical mChrA sequences.

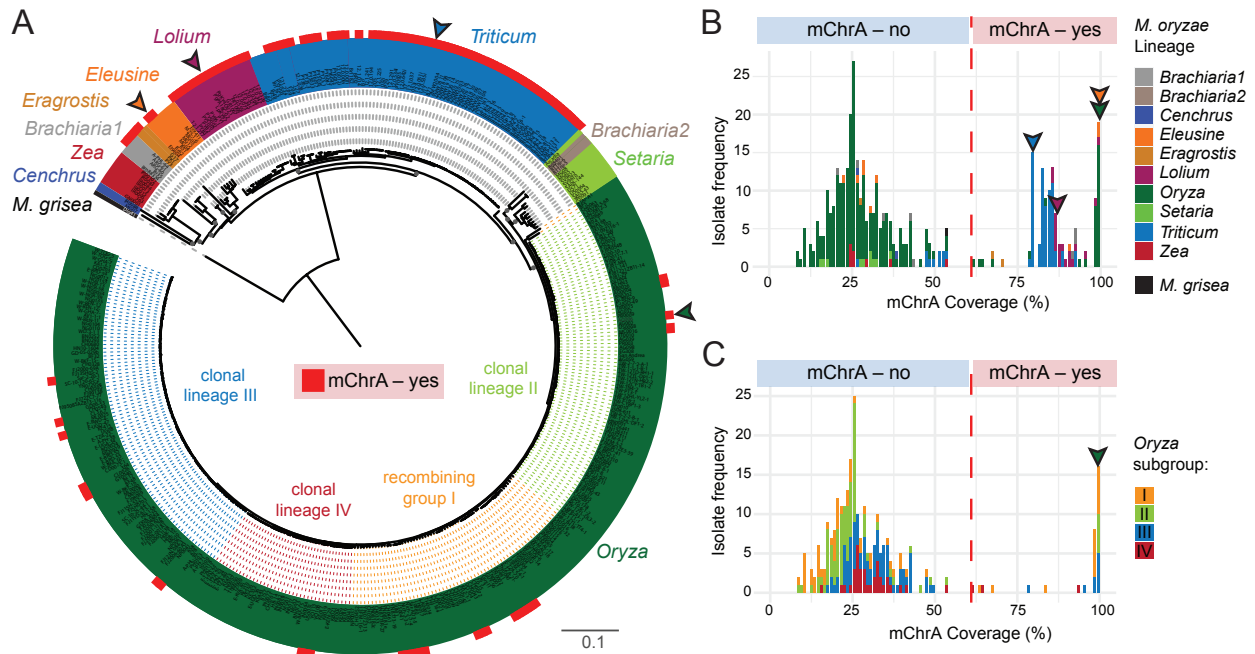

211 **Fig 2. mChrA sequences are present across multiple host-associated blast fungus lineages. A.**  
 212 Genome-wide SNP-based NJ tree of 413 *M. oryzae* and *M. grisea* isolates. *M. oryzae* isolates are color-coded by  
 213 lineage and *M. grisea* is in black. The 126 isolates defined as mChrA carriers (Table S9) are highlighted by a red square  
 214 and belong to six different *M. oryzae* lineages. Arrows indicate isolates with mChrA-related karyotyping information  
 215 (Peng et al. 2019; Rahnama et al. 2020), see Fig 4). Colors of dotted lines across the rice blast lineage represent  
 216 different genetic subgroups (three clonal lineages and a recombining group) (Latorre et al. 2020). Scale bar represents  
 217 nucleotide substitutions per position. **B.** Bimodal distribution of mChrA breadth of coverage across 413 *M. oryzae*  
 218 and *M. grisea* isolates. The coverage cutoff (61%) for mChrA presence or absence is indicated by the dotted red line.  
 219 Arrows as in A. **C.** mChrA breadth of coverage across 276 rice blast fungus isolates. Colors represent different  
 220 genetic subgroups in the *Oryza* lineage. Arrows and coverage cutoff as in B.

221 **Discordant genetic clustering between the core genome and mChrA**  
 222  
 223

224 Given the patchy distribution of mChrA sequences across isolates from different host-associated blast  
225 fungus lineages, we investigated the evolutionary relationships of their core genome and mChrA  
226 sequences. Using SNP-based phylogenies and principal component analyses (PCA), we found a clear  
227 discordance between the core genome and mChrA (**Fig 3A-D**). For the core genome, isolates are  
228 clustered by lineage, whereas for mChrA, lineage-dependent clustering becomes less evident. Most  
229 strikingly, whereas the core genomes of isolates from the *Oryza* and *Eleusine* lineages form two distinct  
230 groups (**Fig 3A, B** and **S7A**), these two fall within a single group for mChrA (**Fig 3C, D** and **S7B**). This  
231 shows that the mChrA sequence in isolates from these two lineages is highly similar, but their core genome  
232 is divergent. We note that for the mChrA clustering, three clonal rice blast fungus isolates did not group  
233 with other isolates from this lineage, possibly reflecting mChrA sequence dissimilarity.

234  
235 To ascertain the robustness of the observed genetic clustering of mChrA between members of the *Oryza*  
236 and *Eleusine M. oryzae* lineages, we generated phylogenies using 100 randomly selected genomic regions  
237 of the same size as mChrA (1.2Mb) across the core genome of all 126 isolates. In all instances, the *Oryza*  
238 lineage was monophyletic, and in zero instances did the *Oryza* and *Eleusine* lineages cluster together (**Fig**  
239 **3E**). This demonstrates that the clustering of members of the *Eleusine* and rice blast fungus lineages is  
240 highly unusual and limited to the mChrA sequence. To complement this analysis, we evaluated genetic  
241 differentiation between isolates belonging to the rice and *Eleusine* blast fungus lineages carrying the mChrA  
242 sequence by calculating the fixation index ( $F_{ST}$ ) from genome-wide SNP data (Wright 1951). This analysis  
243 confirmed high levels of inter-lineage genetic differentiation in the core genome, but low differentiation  
244 levels for mChrA (**Fig 3E** and **S8**). We conclude that mChrA shows discordant genetic clustering when  
245 compared to the core genome, which indicates contrasting evolutionary trajectories.

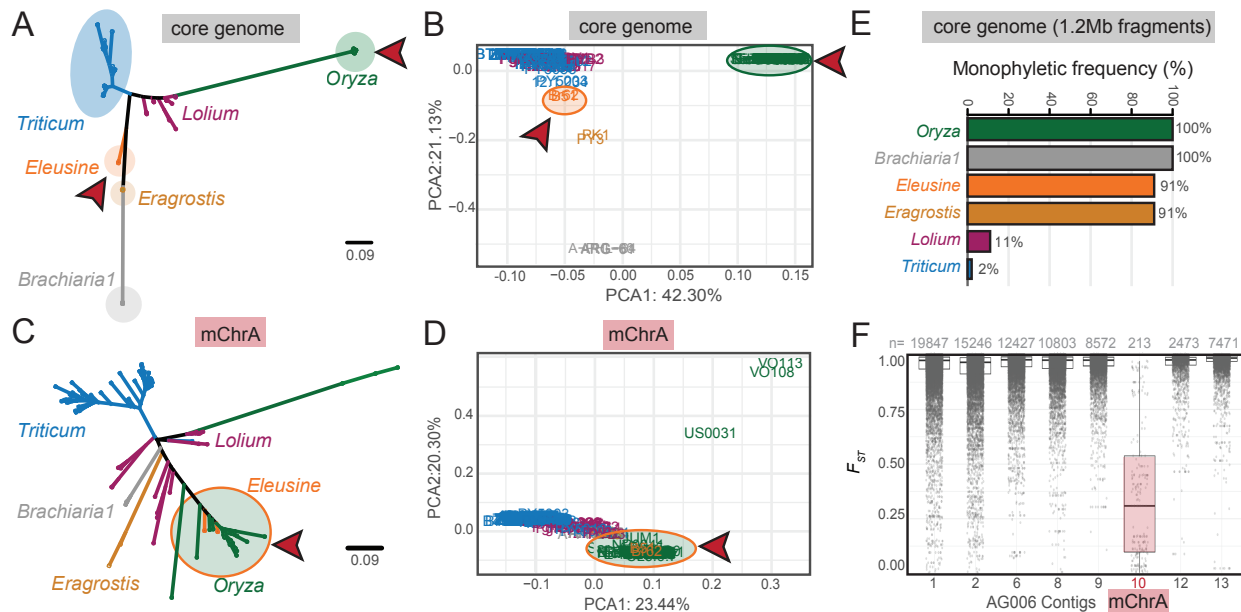

246  
247 **Fig 3. Discordant genetic clustering between the core genome and mChrA.** A-D. SNP-based NJ  
248 trees (A and C) and Principal Component Analyses (PCA, B and D) of 126 *M. oryzae* isolates carrying the mChrA  
249 sequence. Discordance between core genome (A and B) and mChrA (C and D) genetic clustering is observed (red  
250 arrows). Scale bar represents nucleotide substitutions per position. E. Percentage of tree topologies where a  
251 monophyletic relationship was observed for 100 randomly selected 1.2Mb core-chromosomal regions. F.  $F_{ST}$   
252 between rice blast fungus isolates (n=32) and isolates from the *Eleusine* lineage (Br62 and B51) both carrying mChrA.  
253 Each dot (gray) indicates the weighted  $F_{ST}$  per 5kb window using a step size of 500bp. The number of windows per  
254 contig are at the top of each box. Core chromosome contigs >2Mb and mChrA are shown.

255 ***Eleusine* isolate Br62 and *Oryza* isolate AG006 carry an intact and highly syntenic**  
256 **mChrA**

257 Following the identification of highly similar mChrA sequences in two isolates from the *Eleusine* blast  
258 fungus lineage, we aimed to determine whether these sequences originate from an intact mChr, or  
259 whether they are embedded within the core genome, as observed for mChrC segments in *M. oryzae*  
260 isolate 70-15 (Langner et al. 2021). To test this, we performed CHEF-gel based karyotyping, and found  
261 that Br62 possesses a single mChr of the same size (1.2Mb) as mChrA in AG006 (**Fig 4A**). We performed  
262 whole-genome sequencing of Br62 using both Illumina short reads and Nanopore long reads, followed by  
263 *de novo* whole-genome assembly (**Table S10**). Subsequent whole-genome alignment between AG006  
264 and Br62 revealed that Br62\_Contig07 corresponds to mChrA (AG006\_Contig10) and AG006\_Contig17  
265 (**Fig 4B**). Furthermore, the alignment of the mChrA in both isolates revealed a high level of synteny, with  
266 a single re-arrangement in the center of mChrA (**Fig 4C**).

267  
268 To independently validate these findings, we took advantage of a Br62 isolate that lost mChrA after  
269 subculturing, as determined by CHEF gel electrophoresis (**Fig S9A**). To identify contigs that originate  
270 from the mChr, we sequenced the genome of the Br62 isolate that lacks the 1.2Mb mChr (referred to as  
271 Br62-) using Illumina short-reads and aligned the reads to the Br62 genome. We calculated mapping depth  
272 per contig in Br62 and Br62-. Depths were consistent in both isolates except for Contig07, here Br62-  
273 displayed a near-zero read depth, indicating this corresponded to mChrA (**Fig S9B**). Additionally,  
274 Contig07 exhibited a high repeat content, a characteristic feature of mChr (**Fig S9C**). Together these  
275 analyses confirm the presence of an intact mChrA in Br62. Intriguingly, subculturing not only resulted in  
276 the loss of mChrA in Br62 but also in the loss of the mosaic mChrM in AG006 (**Fig 4A**), underlining the  
277 dynamic nature of mChr (Peng et al. 2019; Langner et al. 2021; Liu et al. 2022).

278  
279 We next set out to determine whether the mChrA sequence is also found as an intact mChr in isolates  
280 belonging to other blast fungus lineages known to carry mChr (Peng et al. 2019; Rahnama et al. 2020), and  
281 which we identified as mChrA carriers (**Table S9**). We performed pairwise whole-genome alignments  
282 between AG006, isolate LpKY97 from the *Lolium* lineage, and isolate B71 from the *Triticum* lineage. Here,  
283 mChrA partially aligned to the mChr of both B71 and LpKY97, and to the end of chromosome 3 in B71,  
284 which was previously identified as a potential segmental duplication between the B71 mChr and core  
285 chromosomes (Peng et al. 2019; Liu et al. 2022; Gyawali et al. 2023) (**Fig 4C** and **Fig S10A-C**). The  
286 partial mChrA alignments are in accordance with our genetic clustering and breadth of coverage analyses,  
287 indicating that mChrA-like mChr are present in LpKY97 and B71, but these are structurally divergent  
288 from mChrA in AG006 and Br62 (**Table S6**). As a negative control, we aligned mChrA from AG006 to  
289 the conserved mChrC in the rice blast fungus isolate PR003 using the same parameters and no alignments  
290 were retrieved. We conclude that mChrA is present as an intact and highly syntenic mChr in the rice  
291 blast fungus isolate AG006 and in *Eleusine* blast fungus isolate Br62.



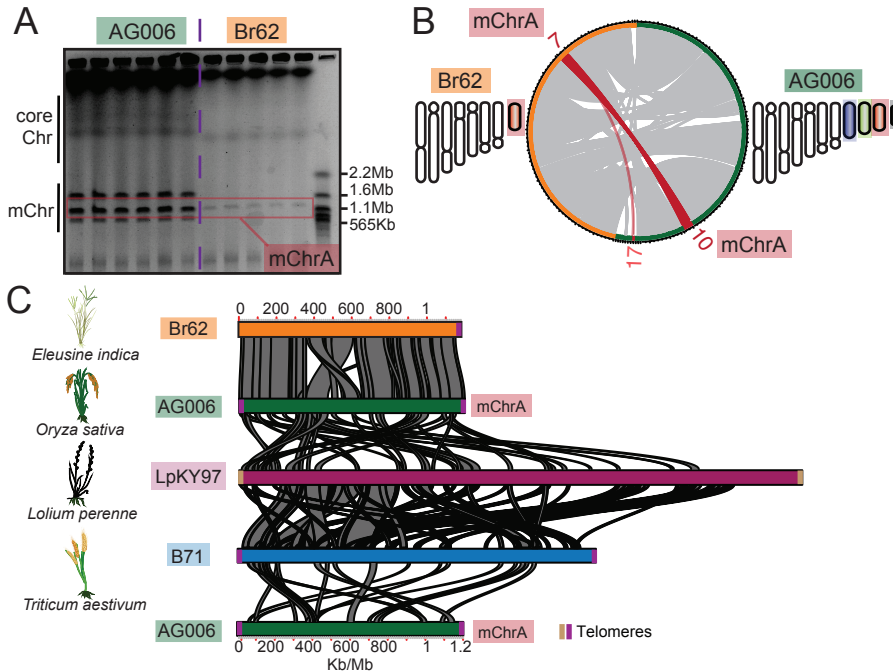

292  
293 **Fig 4. *Eleusine* isolate Br62 and *Oryza* isolate AG006 carry an intact and highly syntenic**  
294 **mChrA. A.** CHEF-gel karyotyping of AG006 and Br62. Six gel lanes per isolate are shown representing a single  
295 biological replicate. Br62 carries a 1.2Mb mChr, the same size as mChrA in AG006 (in red). **B.** Whole-genome  
296 alignment of Br62 (orange) and AG006 (green). Br62\_Contig07 aligns exclusively to mChrA (AG006\_Contig10) and  
297 AG006\_Contig17 (red). For both isolates a schematic karyotype is depicted. **C.** Alignment of mChrA in AG006 and  
298 Br62 reveal high synteny, except for a rearrangement in the central region. Alignments covering a fraction of mChrA  
299 are seen among mChrA in AG006 and the mChrA-like mChrI in *Lolium* isolate LpKY97 (magenta) and the mChr in  
300 *Triticum* isolate B71 (blue). Telomeric sequences are indicated by vertical lines (purple/brown). The host plant of  
301 each isolate is shown on the left.

### 303 Multiple horizontal mChrA transfers occurred in clonal rice blast fungus lineages

304 To test if sexual mating or horizontal gene transfer (HGT) can explain the presence of mChrA in the  
305 *Eleusine* and *Oryza* blast fungus lineages, we evaluated patterns of allele sharing through *D*-statistics (Green  
306 et al. 2010; Durand et al. 2011). After the mChrA sequence is removed from the genomes, we hypothesize  
307 that sexual mating results in a genome-wide introgression signal, leading to a *D*-statistic significantly  
308 different from zero, whereas HGT will not produce such a signal. Consequently, we first removed mChrA  
309 sequences, and then compared Br62 with the 32 rice blast fungus isolates carrying mChrA sequences, and  
310 13 rice blast isolates not carrying this sequence (see Methods). For each comparison, rice blast fungus  
311 isolates belonging to the same *Oryza* subgroup were chosen. We selected *M. grisea* isolate Dig41 as an  
312 outgroup, which is divergent from both the rice and *Eleusine* blast fungus lineages. This resulted in the  
313 phylogenetic configuration: (Dig41, Br62; *Oryza* +mChrA, *Oryza* -mChrA). Under this configuration, a 99%  
314 confidence interval encompassing  $D=0$  indicates there is no genome-wide introgression signal and favors  
315 the hypothesis of horizontal mChrA transfer. On the other hand, a 99% confidence interval not  
316 encompassing  $D=0$  signals genome-wide introgression, supporting the acquisition of mChrA through  
317 sexual mating. In all tested configurations except those involving isolate BR0026 (31 of 32 isolates), the  
318 99% confidence interval encompassed  $D=0$ , supporting the acquisition of mChrA by horizontal transfer  
319 (**Fig 5A** and **Table S1 I**). As a control, we tested the configurations (Dig41, Br62; *Oryza* +mChrA, *Oryza*  
320 +mChrA) (**Fig S1 I A**) and (Dig41, Br62; *Oryza* -mChrA, *Oryza* -mChrA) (**Fig S1 I B** and **Table S1 I**).  
321 Here, the 99% confidence interval encompassed  $D=0$  in all tested configurations.

322 Having established that mChrA was likely horizontally acquired in the large majority of rice blast fungus  
323 isolates carrying this sequence (31 of 32 isolates), and given its patchy distribution across the rice blast  
324 fungus lineage, we sought to differentiate between a single ancestral mChrA acquisition followed by  
325 independent losses, and multiple independent mChrA acquisitions. To test this, we estimated the genetic  
326 distance between the mChrA sequence present in the 32 *Oryza* isolates and Br62 and compared it to the  
327 genetic distance between random core chromosomal fragments of the same size as mChrA in the same  
328 32 *Oryza* isolates (1.2Mb) and Br62. A significant correlation between the two genetic distances indicates  
329 that both the mChrA and the core chromosomes have accumulated mutations in a correlated way. This  
330 would support a single ancestral mChrA acquisition by the *Oryza* lineage, followed by multiple mChrA  
331 losses, whereas a lack of correlation suggests independent mChrA acquisitions. By analyzing correlations  
332 between genetic distances relative to Br62 instead of the magnitude of the distances, our analysis is not  
333 confounded by changes in mutation rate or different strengths of purifying selection operating at the  
334 mChrA and core chromosome level. We did not find any correlation in genetic distances between mChrA  
335 and Br62, and core chromosomes and Br62 (**Fig 5B**). As a control, we compared genetic distances to  
336 Br62 among two sets of core chromosomal regions and found a strong correlation (**Fig 5C**). Together,  
337 these results favor the hypothesis that the observed mChrA distribution in the rice blast fungus lineage is  
338 the result of multiple independent mChrA acquisitions.

339  
340 In addition, we reconstructed the ancestral states of mChrA presence or absence along the clonal rice  
341 blast fungus phylogeny and found evidence for nine independent horizontal mChrA acquisitions. Using a  
342 time-scaled phylogeny, we could time these events to have occurred within the past three centuries (**Fig**  
343 **5D**).

344  
345 In summary, we provide compelling evidence supporting the scenario of multiple horizontal mChrA  
346 transfers involving members of the *Eleusine* and *Oryza* blast fungus lineages. A minimum of nine  
347 independent mChrA acquisitions and multiple independent losses occurred across clonal rice blast fungus  
348 lineages over the past three centuries.

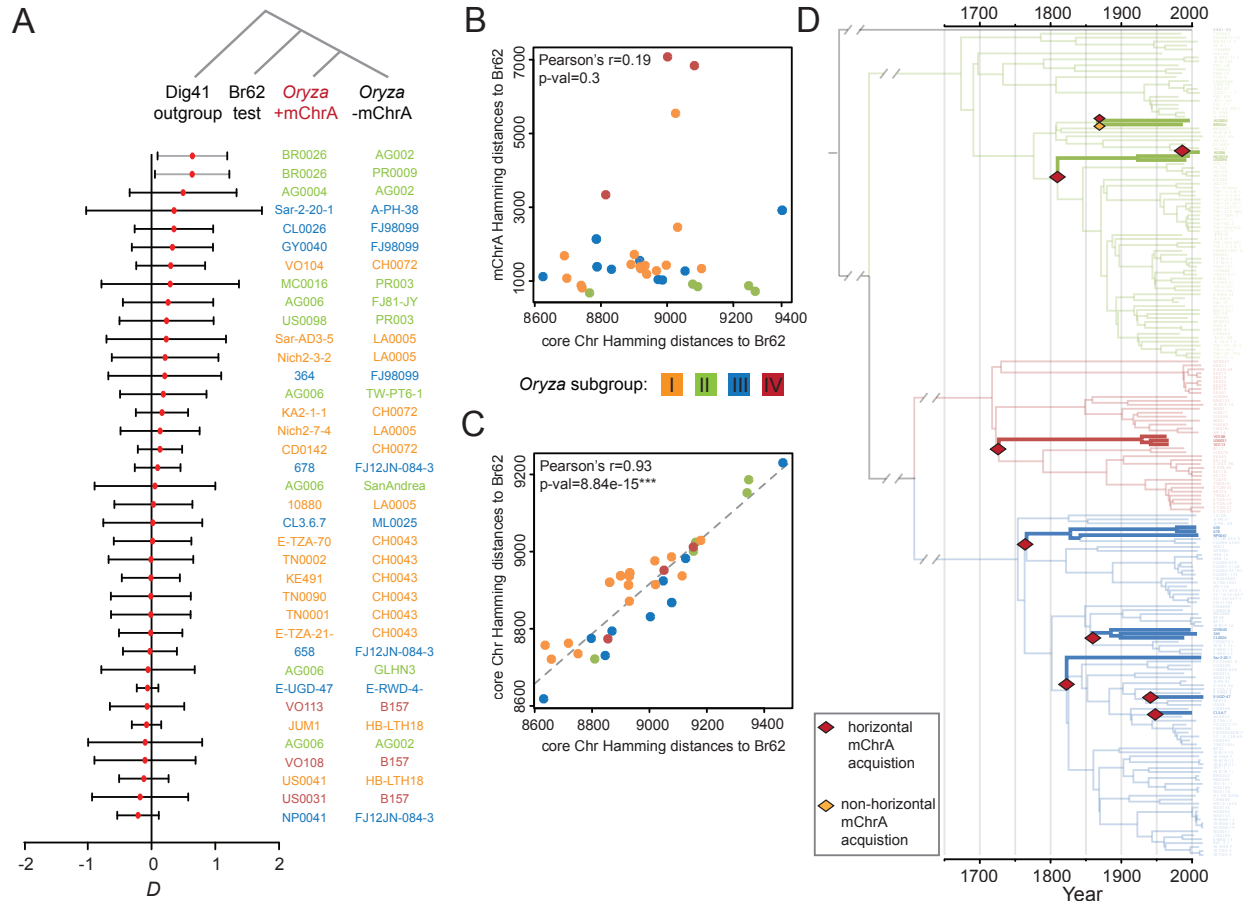

349

350

351

352

353

354

355

356

357

358

359

360

**Fig 5. Multiple mChrA transfers occurred in clonal rice blast fungus lineages.** **A.** *D*-statistics. Lines depict 99% confidence intervals and the red dot the estimated *D* value. Lines not encompassing *D*=0 are gray and the rest black. Jack-knife blocks were five million base pairs long. **B.** Hamming distances between mChrA and random core chromosomal regions of rice blast fungus isolates compared to Br62. **C.** Genetic distances between two sets of random core chromosomal regions in rice blast fungus isolates compared to Br62. **D.** Ancestral states of mChrA presence or absence along the clonal rice blast fungus phylogeny. Thick lines indicate mChrA is present. Branches are color-coded by lineage. The SA05-43 isolate from the *Setaria* blast fungus lineage was chosen as an outgroup. Branches with evidence for horizontal mChrA acquisition are indicated by a red diamond, the branch where there is evidence for sexual transfer or ILS is indicated by a yellow diamond.

## Discussion

361

362

363

364

365

366

367

368

369

370

371

Crop disease pandemics are frequently caused by clonal lineages of plant pathogens that reproduce asexually. The mechanisms enabling these clonal pathogens to adapt to their hosts, despite their limited genetic variation, remain an area of active research. In our study, we demonstrate that mini-chromosomes (mChr) serve as a source of genetic variation for asexual clonal pathogens. We observed horizontal mini-chromosome transfer occurred in field isolates belonging to clonal populations of the rice blast fungus *M. oryzae*. Our findings demonstrate horizontal acquisition of a 1.2Mb supernumerary mChr by clonal rice blast isolates from a genetically distinct lineage infecting *Eleusine indica*, a wild grass species. We identified a minimum of nine independent horizontal mChr acquisitions over the past three centuries. This establishes horizontal mChr transfer as a process facilitating genetic exchange between host-associated blast fungus lineages in the field. We propose that blast fungus populations infecting wild grasses serve as genetic reservoirs for clonal populations infecting cultivated crops. Horizontal acquisition of mChr by

372 clonal blast fungus isolates appears to increase their genetic diversity, driving genome evolution and  
373 potentially aiding in its adaptability.

374  
375 The genetic mechanisms underlying horizontal minichromosome (mChr) transfer in clonal fungus isolates  
376 are intriguing. Under laboratory conditions, horizontal transfer of mChr between fungal isolates has been  
377 facilitated through methods such as protoplast fusion (Akagi et al. 2009) or co-culturing (Masel et al. 1996;  
378 He et al. 1998; Ma et al. 2010; Vlaardingerbroek et al. 2016; van Dam et al. 2017). Underlying these mChr  
379 transfers is parasexual recombination (Soanes and Richards 2014; Vlaardingerbroek et al. 2016). Here,  
380 cells from different individuals fuse via anastomosis, forming heterokaryons (Roca et al. 2003; Roca et al.  
381 2005; Ishikawa et al. 2010; Vangalis et al. 2021). These heterokaryons can become unstable polyploid cells,  
382 undergoing chromosome reassortment during mitosis (Mela et al. 2020). In the case of *Magnaporthe* spp.  
383 parasexual crosses do not exhibit heterokaryon incompatibility and are therefore viable (Crawford et al.  
384 1986). This mechanism has been suggested as a source of genetic variation in the rice blast fungus,  
385 potentially occurring under field conditions (Zeigler et al. 1997; Noguchi et al. 2006; Tsujimoto Noguchi  
386 2011; Monsur and Kusaba 2018). Here, we found robust evidence that horizontal mChr transfer occurs  
387 under field conditions, a process probably parasexual in nature.

388  
389 Parasexuality offers fungi an alternative route to enhancing genetic diversity, while maintaining relative  
390 genomic stability and avoiding the complexities of sexual reproduction, including pre-mating barriers like  
391 reproductive timing and post-mating issues such as hybrid incompatibilities (Roper et al. 2011;  
392 Stukenbrock 2013). Recently, it was proposed that chromosome reassortment during parasexual  
393 recombination may not be entirely random (Habig et al. 2023). Here, it was suggested that some mChr  
394 are preferentially transferred or tend to resist degradation compared to others, resembling the behavior  
395 of selfish genetic elements (Ahmad and Martins 2019). This phenomenon could be attributed to distinct  
396 chromatin conformations of the mChr. Future research will investigate whether mChrA carries chromatin  
397 remodeling elements that could enable its horizontal transfer or shield it from degradation, potentially  
398 elucidating the relatively frequent horizontal transfer events observed across the rice blast fungus lineage.  
399 Moreover, to better understand the impact of horizontal mChr transfer on *M. oryzae* evolution, it will be  
400 crucial to study how frequent and diverse these events are in field populations.

401  
402 Not all instances of inter-lineage transfer events of the mChrA sequence seem to be the product of  
403 parasexually-mediated horizontal transfer. Hybridization through sexual mating is a major player shaping  
404 the evolution of fungal plant pathogens, bringing forth a myriad of novel genetic combinations for selection  
405 pressures to act on (Stukenbrock 2016). In *M. oryzae*, there is evidence of sexual mating occurring both  
406 within and between specific host-associated blast fungus lineages, occasionally facilitating host jumps  
407 (Gladieux, Ravel, et al. 2018). In our study, one clonal rice blast fungus isolate, BR0026, exhibited genome-  
408 wide introgression signals with *Eleusine* isolate Br62. One plausible hypothesis is that the introgression  
409 signals observed in BR0026 may reflect ancient sexual reproduction events involving an isolate from the  
410 *Eleusine* lineage. Given that these two isolates were collected in South America, it is possible that sympatry  
411 in this region led to sexual reproduction between members of the rice and *Eleusine* lineages.

412  
413 In addition to isolates belonging to the *Eleusine* and *Oryza* blast fungus lineages, isolates belonging to the  
414 *Triticum* and *Lolium* lineages also carry mChrA-like sequences. It remains to be determined whether these  
415 were obtained via horizontal transfer or sexual reproduction. The absence of genetic discordance between

416 the core chromosomes and mChrA in these isolates supports sexual reproduction. In addition, substantial  
417 admixture has been observed among members of the *Triticum* and *Lolium* lineages (Gladieux, Ravel, et al.  
418 2018), suggesting that sexual reproduction may be the route through which mChrA-like sequences were  
419 acquired.

420  
421 Our study on the prevalence of horizontal gene exchange within local populations underscores the  
422 importance of accounting for ecological factors, especially in fungi that tend to specialize in specific hosts.  
423 Although our global comprehension of blast fungus populations has expanded, the detailed study of local  
424 populations, particularly those that include isolates from both wild and cultivated hosts, remain scarce  
425 (Cruz and Valent 2017; Barragan et al. 2022). One question to address will be how horizontal gene  
426 exchange through parasexuality is enabled in natural environments. In the case of the blast fungus, one  
427 factor offering an avenue for genetic interchange may be the absence of strict host-specialization (Gladieux,  
428 Condon, et al. 2018). Laboratory studies have shown that hosts like barley and common millet are  
429 susceptible to genetically distinct blast fungus lineages (Kato et al. 2000; Hyon et al. 2012; Chung et al.  
430 2020). In the field, some cases of cross-infection have been reported, but the extent to which these occur  
431 in local populations is unknown (Gladieux, Condon, et al. 2018). Such susceptible hosts could serve as  
432 hubs for genetic exchanges, potentially contributing to horizontal mChr transfers between isolates from  
433 different lineages. Moreover, being a facultative biotroph, the blast fungus possesses the ability to thrive  
434 on both living plants and saprophytically on decaying plant matter. This broadens the window for possible  
435 genetic interactions, as the pathogen does not require synchronous growth within the same living hosts  
436 for this to occur. Understanding gene flow within local blast fungus populations through the study of  
437 horizontal gene transfer and other mechanisms, is vital for developing effective disease management  
438 strategies. For example, identifying frequent horizontal gene exchange between isolates infecting specific  
439 hosts could lead to targeted measures such as strategic weeding or focused fungicide application.

440  
441 One persistent challenge in pinpointing elements of the accessory genome, such as mChr, has been the  
442 biases arising from aligning sequencing reads to a single reference genome. In past comparative genomic  
443 approaches, mChrA went unnoticed, as we aligned isolates carrying this sequence to the MG08 reference  
444 genome from isolate 70-15, which lacks the mChrA sequence. Leveraging pan-genomes, which are  
445 continuously gaining traction across the fungal kingdom (Badet and Croll 2020) or *de novo* assemblies using  
446 short read data (Potgieter et al. 2020), coupled with reference-independent genetic clustering approaches  
447 like k-mer (Zielezinski et al. 2017; Aylward et al. 2023) or read-based (Dylus et al. 2024) techniques,  
448 promises more accurate identification of mChr and of horizontally introgressed regions. The latter could  
449 be detected by first identifying mChr and other accessory genomic elements, and then comparing them  
450 with the core genome. Studies of this nature have recently detected cases of horizontal introgression in  
451 other fungal pathogens (Moolhuijzen et al. 2022; Petersen et al. 2023). In addition to these approaches,  
452 the integration of artificial intelligence to distinguish between core chromosomes and mChr using short-  
453 read sequencing data presents a timely and innovative approach (Gyawali et al. 2023). The successful  
454 implementation of such methodologies will not only facilitate the large-scale identification of candidate  
455 mChr regions across isolates, but also help establish whether these regions are preferentially involved in  
456 horizontal transfer events.

457  
458 The horizontal transfer of mChrA from a blast fungus lineage that infects the wild grass *Eleusine indica* to  
459 clonal rice blast fungus lineages underscores the intricate ecological interactions involved. Wild grasses



460 can act as potential genetic reservoirs, echoing the dynamics observed in zoonotic diseases where  
461 pathogens jump between wild animals and humans (Rahman et al. 2020). This analogy between the plant  
462 and animal realms highlights the significance of wild species as reservoirs of pathogens and suggests the  
463 possibility of genetic transfers. However, surveys on blast disease often focus on cultivated crops,  
464 neglecting wild hosts (Barragan et al. 2022). Therefore, enhanced awareness and surveillance of gene flow  
465 dynamics in local blast fungus populations are necessary. This should include investigations into the role  
466 of wild grasses as genetic conduits, similar to the concept of zoonoses. Such understanding is crucial for  
467 the early identification and prevention of genetic transfers that could initiate new disease outbreaks or  
468 intensify existing ones.

469

## 470 Conclusion

471 Clonal isolates of the blast fungus are a significant agricultural concern due to their central role in causing  
472 crop disease pandemics. Key to tackling this issue is understanding how genetically uniform populations  
473 adapt to novel hosts. Our research has revealed that supernumerary mini-chromosomes undergo  
474 horizontal transfer in natural field conditions. Notably, we found that mChrA has been transferred  
475 horizontally on multiple independent occasions involving isolates from a lineage of blast fungus affecting a  
476 wild grass and clonal lineages infecting rice. This finding sheds light on the role of horizontal mini-  
477 chromosome transfer in driving the genome evolution of clonal blast fungus populations, potentially aiding  
478 in host adaptation. Isolates originating from wild grasses may act as reservoirs of genetic diversity (**Fig 6**).  
479 These insights underscore the importance of disease surveillance that encompasses both agricultural crops  
480 and adjacent wild grass species.

481

## 482 Model

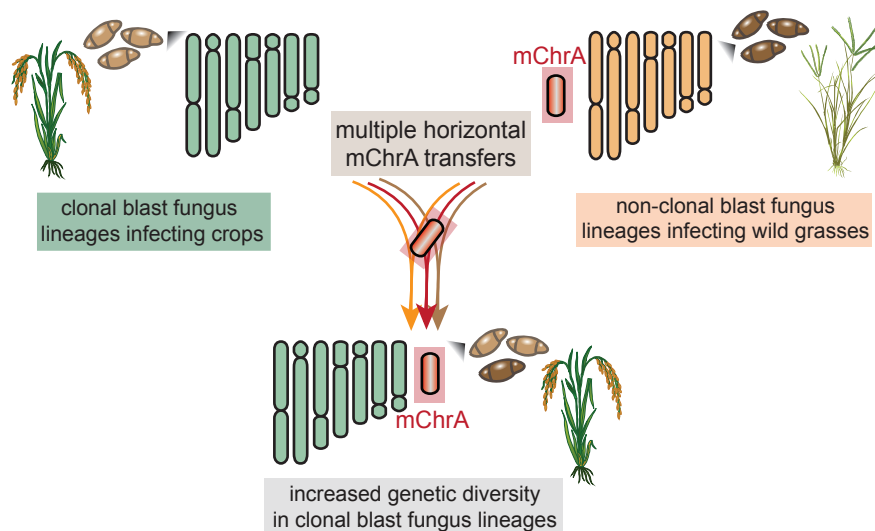

483

484 **Fig 6. Horizontal mini-chromosome transfers from blast fungus lineages infecting wild grasses**  
485 **drive genome evolution of clonal lineages infecting crops.** The recurrent acquisition of mChrA from  
486 wild grass-infecting blast fungus lineages by clonal rice blast fungus lineages enhances their evolutionary adaptability  
487 and capacity to respond to changing environments and hosts. The coexistence of infected crops and wild hosts  
488 facilitates this genetic exchange, posing a challenge to the management of crop disease pandemics.

489

## 490 Materials and Methods

### 491 Blast fungus growth conditions

492 Blast fungus isolates were grown from filter paper stocks by placing these on complete medium (CM) for  
493 7-14 days in a growth chamber at 24°C with a 12 hour light period to induce growth of mycelium and  
494 sporulation. For liquid cultures, 8-10 small blocks of mycelium (ca. 0.5 x 0.5cm) were cut out of the edge  
495 of fully grown colonies with a sterile spatula, transferred into 150ml of liquid CM medium in a 250ml  
496 Erlenmeyer flask and incubated on a rotary shaker at 120 rpm and 24°C for 2-3 days.

497

### 498 **Visualization of worldwide blast fungus distribution**

499 Maps showing the geographical locations of the studied blast fungus isolates were plotted with the R-  
500 package ggmap (v3.0) (Kahle and Wickham 2013). In the case of the San Andrea isolate, no exact collection  
501 coordinates were available, so the location of the San Andrea Chapel in Ravenna, in Italy's Po Valley, the  
502 region where most other samples were collected from, was chosen.

503

### 504 **Whole-genome and mini-chromosome sequencing and genome assembly**

505 Whole-genome sequencing and assembly of nine Italian blast fungus isolates, including AG006, is described  
506 in (Win et al. 2020). Briefly, these isolates were sequenced using the PromethION sequencing platform  
507 (Oxford Nanopore Technologies, Oxford, UK) and assembled into contigs using Canu (Koren et al. 2017).  
508 Assemblies were then polished with Illumina short reads using Pilon (Walker et al. 2014) and Racon (Vaser  
509 et al. 2017) and their completeness assessed using BUSCO (Simão et al. 2015), with a 97.7-98.8%  
510 completeness score taking the *ascomycota\_odb10* database as input (Win et al. 2020). Mini-chromosome  
511 isolation sequencing (MCIS) of these isolates was performed as described in (Langner et al. 2019; Langner  
512 et al. 2021). In short, mini-chromosomes (mChr) were separated from core chromosomes using CHEF  
513 gel electrophoresis. DNA was eluted from gel plugs and sequencing libraries were prepared using a  
514 modified version (custom barcodes) of the Nextera Flex library preparation kit (Illumina). Sequencing of  
515 mini-chromosomal DNA libraries was carried out on a NextSeq500 system (Illumina). For whole-genome  
516 sequencing and *de novo* assembly generation of the Br62 isolate, high molecular weight DNA was extracted  
517 following (Jones et al. 2021). Sequencing runs were then performed by Future Genomics Technologies  
518 (Leiden, The Netherlands) using the PromethION sequencing platform (Oxford Nanopore Technologies,  
519 Oxford, UK). Long reads were assembled into contigs and corrected using Flye (v2.9-b17680)  
520 (Kolmogorov et al. 2019) and polished with long reads using Medaka (v1.7.2)  
521 (<https://github.com/nanoporetech/medaka>), and using Illumina short reads (San Diego, USA) through two  
522 consecutive iterations of Pilon (v1.23) (Walker et al. 2014). The resulting assembly was of high quality and  
523 contiguity, with a BUSCO (Simão et al. 2015) completeness score of 97.4% using the *ascomycota\_odb10*  
524 database and resulting in ten contigs (**Table S10**).

525

### 526 **Identification of mini-chromosomes in whole-genome assemblies**

527 MCIS read quality was assessed using fastQC (Andrews 2010). Low quality and adapter sequences were  
528 removed using trimmomatic (Bolger et al. 2014). mChr reads were mapped to whole-genome assemblies  
529 of each strain using BWA-mem (Li 2013) with default parameters. Reads with multiple mappings (mapping  
530 quality = 0) and secondary alignments were removed using samtools (Danecek et al. 2021). MCIS read  
531 coverage was calculated in 1 kb sliding windows with a step size of 500bp using bedtools (Quinlan and Hall  
532 2010). The depth of unambiguously mapping reads was plotted using the R package circlize (Gu et al.  
533 2014). To estimate the repeat content across core and mChr in the nine Italian rice blast isolates, we  
534 annotated these using RepeatMasker (<http://www.repeatmasker.org/>). The input repeat library consisted  
535 of the RepBase repeat library for fungi (<https://www.girinst.org/repbase/>), and repeat libraries from

536 (Chiapello et al. 2015; Peng et al. 2019). For <2Mb contigs repeat content was plotted across 100kb sliding  
537 windows and a step size of 50kb, while for >2Mb contigs 10kb windows with a 5kb step size were chosen.  
538

### 539 **Whole-genome and mini-chromosome alignments and telomere identification**

540 Whole genome and contig-specific alignments between *M. oryzae* isolates were generated using the  
541 nucmer function of MUMMER4 (Marçais et al. 2018). Alignments of a minimum length of 10kb (-l 10000)  
542 and >80% percent identity (-i 80) were chosen to retrieve contiguous alignments. Alignment coordinates  
543 were extracted and whole genome alignments were plotted using the circlize package (Gu et al. 2014).  
544 Alignments between individual contigs were visualized with the karyoploteR package (Gel and Serra 2017).  
545 We visually inspected mChr contigs for the presence of (CCCTAA/TTAGGG)<sub>n</sub> canonical telomeric  
546 repeats (Cevernak et al. 2021).  
547

### 548 **Genetic analysis of blast fungus isolates: mapping and variant calling**

549 Illumina short reads of 413 *M. oryzae* and *M. grisea* isolates infecting different host plants (**Table S6**)  
550 were trimmed using AdapterRemoval (v2.3.1) (Schubert et al. 2016) and then mapped to the AG006  
551 reference genome (Win et al. 2020) using bwa-mem (v0.7.17) (Li 2013) with default parameters. Variant  
552 identification was performed using GATK (v4.1.4.0) (McKenna et al. 2010). High-quality SNPs were filtered  
553 based on the Quality-by-Depth (QD) parameter using GATK's VariantFiltration. Only biallelic SNPs within  
554 one standard deviation of the median value of QD scores across all SNPs were kept (Latorre et al. 2022).  
555 To study the phylogenetic relationship between isolates belonging to the rice blast fungus lineage, we  
556 subsetted 274 isolates belonging to this lineage (isolates BF5 and BTAr-A1 were removed due to them  
557 being outliers in the rice blast fungus phylogeny) and kept informative SNPs with no missing data using  
558 VCFtools (v0.1.14). From this dataset, we created a NeighborNet using Splitstree (Huson and Bryant  
559 2006). We repeated this process for members of the *Oryza* clonal lineage II only, and constructed a  
560 Maximum-Likelihood (ML) tree using MEGA (v10.2.4) (Kumar et al. 2018), with 100 bootstraps (see data  
561 availability). We repeated the same process for the analysis of all 413 isolates shown in Fig 1 (**Table S6**).  
562 Here, two isolates were removed due to the high amount of missing sites (FR13 and 98-06). Based on  
563 these SNPs, we created a NJ tree using MEGA (v10.2.4) (Kumar et al. 2018), with 100 bootstraps (see  
564 data availability). Isolates deemed as mChrA carriers were highlighted using iTol (Letunic and Bork 2021).  
565 To assess for potential discordance in genetic clustering of the core genome and mChrA, we subsetted  
566 isolates carrying mChrA (n=126). For both the core genome and mChrA, only SNPs with a maximum of  
567 10% missing data were kept (--max-missing 0.9) using VCFtools (v0.1.14). NJ trees were constructed using  
568 IQtree (v2.03) using fast mode (see data availability). SNP-based Principal Component Analyses (PCA)  
569 were estimated using the --pca function of PLINK2 (Chang et al. 2015). These were visualized using the R  
570 package ggplot2 (v3.4.4, see data availability) (Wickham 2009). To determine the likelihood of the  
571 observed genetic discordance being observed by chance, 100 random 1.2Mb regions across the core  
572 genome in these 126 isolates were subsetted using a custom python script (see data availability), and NJ  
573 trees were computed using IQTree (v2.03) with the fast mode. The number of times each lineage was  
574 monophyletic was estimated using a provided custom python script (see data availability). To evaluate  
575 genetic differentiation between members of the *Eleusine* and *Oryza* lineages carrying the mChrA sequence,  
576 the fixation index ( $F_{ST}$ ) based on genome-wide SNPs was calculated. Rice blast isolates carrying mChrA  
577 (n=32) were compared to the two *Eleusine* isolates carrying mChrA, Br62 and B51, using only SNPs with  
578 no missing data. Weighted  $F_{ST}$  using 5kb window sizes and 500bp step sizes (--fst-window-size 5000 --fst-  
579 step-size 500) was calculated using VCFtools (v0.1.14).

## 580 **mChrC and mChrA breadth of coverage calculations and mChrA-carrier assignment**

581 To investigate the distribution of the mChrC and mChrA sequence across 413 *M. oryzae* and *M. grisea*  
582 isolates, we first calculated the genome-wide breadth of coverage, defined as the percentage of sequence  
583 covered by reads from a particular isolate which mapped to the AG006 reference (**Table S6**). To do  
584 this, we estimated breadth of coverage per contig using samtools depth (v1.19) (Danecek et al. 2021), and  
585 then created a weighted average taking into account contig length. We assessed breadth of coverage for  
586 mChrC (AG006\_Contig03) and mChrA (AG006\_Contig10) across all isolates and then normalized these  
587 values by the isolate's genome-wide breadth of coverage value (**Table S6**). To determine whether an  
588 isolate carried the mChrA sequence or not, we performed clustering using a gaussian mixture model  
589 (GMM) and estimated the Bayesian Information Criterion (BIC) value for 1-10 clusters using the R-package  
590 mclust (v.6.0.0, see data availability) (Scrucca et al. 2023). Using this same package, we also estimated the  
591 uncertainty index for mChrA presence (n=126) or absence (n=287) assignment for each isolate (**Table**  
592 **S9**).

593

## 594 **Identification of mChrA in Eleusine isolate Br62 and mChrA loss Br62-**

595 *M. oryzae* isolate Br62, belonging to the *Eleusine* lineage, initially carried a single mChr identical in size to  
596 mChrA (1.2Mb). To confirm the identity of this mChr, we subcultured Br62 twice via serial passage on  
597 Complete Growth Medium (CM), resulting in the loss of mChr as confirmed through CHEF gel  
598 electrophoresis. We then sequenced the genome of Br62 without the 1.2Mb mChr (referred to as Br62-  
599 ) using Illumina short-reads and compared it to the complete Br62 genome sequences. Mapping depth per  
600 contig was calculated using the samtools depth function (Danecek et al. 2021). Depths were consistent  
601 between Br62 and Br62- except for Contig07, corresponding to mChrA, where Br62- displayed a near-  
602 zero read depth. Additionally, repeat content analysis for the Br62 genome, using the same parameters as  
603 for the Italian rice blast fungus isolates.

604

## 605 **Differentiation between horizontal mChrA transfer from introgression via sexual** 606 **mating**

607 To differentiate between horizontal mChr transfer or sexual mating we assessed patterns of allele sharing  
608 and calculated *D* statistics (Green et al. 2010; Durand et al. 2011) using popstats (Skoglund et al. 2015) as  
609 well as using the custom python script *Dstat.py* (see data availability). We removed the mChrA sequence  
610 from the *Eleusine* and *Oryza* mChrA carriers and set the *M. grisea* isolate Dig41 as an outgroup, resulting  
611 in the following 4-taxa configuration: (Dig41, Br62; *Oryza* +mChrA, *Oryza* -mChrA). The selection of the  
612 non-carrier samples (-mChrA) was random and contingent on their phylogenetic proximity to the tested  
613 mChrA carrier (+mChrA) isolate (**Table S11**). In the case of +mChrA isolate AG006, we performed  
614 comparisons against 13 different *Oryza* -mChrA isolates, selected throughout along the different clades of  
615 the clonal lineage II. As a control, we also tested the 4-taxa configuration: (Dig41, Br62; *Oryza* +mChrA,  
616 *Oryza* +mChrA). The tested isolates were selected based on them having phylogenetic proximity.  
617 Complementary to this, we included a second control using the 4-taxa configuration: (Dig41, Br62; *Oryza*  
618 -mChrA, *Oryza* -mChrA). The testing pair of isolates were chosen randomly and contingent on being part  
619 of the same genetic subgroup of the rice blast fungus lineage. In all tested configurations, we only compared  
620 rice blast fungus isolates belonging to the same subgroup, to avoid potential unequal drift accumulated  
621 between members of different clonal lineages from impacting the analysis. For each configuration we  
622 calculated the 99% confidence interval. *D* values were estimated for jack-knife blocks 5 and 10 million base  
623 pairs in length (**Table S11**).

## 624 **Differentiating between a single and multiple horizontal mChrA transfer events**

625 To differentiate between a single ancestral gain of mChrA followed by independent losses, and  
626 independent mChrA gains. We measured Hamming distances between mChrA in all *Oryza* isolates  
627 carrying this sequence (n=32) and *Eleusine* isolate Br62, and Hamming distances across random core  
628 chromosomal regions (the size of mChrA, 1.2Mb) and Br62 using bcftools (v.1.11) (Danecek et al. 2021),  
629 (see data availability). We then assessed if there is correlation between the two hamming distances. Both  
630 Pearson's correlation coefficient and its *p*-value were estimated. As a control, we compared average  
631 Hamming distances between two sets of core chromosomal regions to Br62 and again calculated Pearson's  
632 correlation coefficient and its *p*-value.

633

## 634 **Dating of horizontal mChrA transfer Events Across Clonal Rice Blast Fungus** 635 **Lineages**

636 In order to infer the dating times of horizontal acquisition of the mChrA sequence in the ancestral nodes  
637 of the rice blast fungus phylogeny, we performed a bayesian-based dated phylogeny incorporating the  
638 isolate collection dates (**Table S6**) using BEAST2 (Bouckaert et al. 2014). We selected the Hasegawa-  
639 Kishino-Yano (HKY) nucleotide substitution model. The collection years of the blast fungus isolates served  
640 as prior information, providing expected units for the estimated evolutionary rate (substitutions/site/year).  
641 In Bayesian analysis, we utilized a log-normal distribution with a mean in real space set at 7.5E-8, based on  
642 previous estimations (Latorre et al. 2022). To minimize the effect of demographic assumptions, we chose  
643 a Coalescent Extended Bayesian Skyline as a tree prior (Drummond et al. 2005). Isolates without a known  
644 collection date were removed from this analysis, and only individuals belonging to rice blast clonal lineages  
645 were used to rule out recombination. We ran six independent chains, each spanning a length of 20 million  
646 iterations using the CIPRES infrastructure (Miller et al. 2010). To ascertain the ancestral states of presence  
647 or absence of the mChrA sequence throughout the rice blast fungus phylogeny, we used the inferred  
648 mChrA presence/absence information based on breadth of coverage analyses (**Table S9**). This was done  
649 for all rice blast fungus isolates, as well as for the SA05-43 isolate which belongs to the *Setaria* blast fungus  
650 lineage, which was set as an outgroup. These values, which were input as discrete states (mChrA = yes/no),  
651 were parameterized in a “mugration” analysis, which was implemented in Treetime (v.0.9.0) (Sagulenko et  
652 al. 2018) ML-tree as input, generated using IQtree (v2.03) (Minh et al. 2020).

653

## 654 **Textual enhancement**

655 The articulation of text within this manuscript was assisted by the machine learning model ChatGPT-4.

656

## 657 **Acknowledgements**

658 We thank all members of the Kamoun laboratory and the BLASTOFF team at the Sainsbury Laboratory  
659 for valuable discussions. We especially thank Vincent Were for valuable suggestions. We also thank Ana  
660 Maria Picco for providing rice blast fungus isolates from Italy, and Alison MacFadyen for managing the  
661 public release of sequencing data.

662

## 663 **Funding**

664 This project was supported by grants from the Gatsby Charitable Foundation, the UK Research and  
665 Innovation Biotechnology and Biological Sciences Research Council (UKRI-BBSRC) grants  
666 BBS/E/J/000PR9795, BBS/E/J/000PR979, BB/W002221/I, BB/W008300/I and BB/R01356X/I the European  
667 Research Council (ERC) advanced grant BLASTOFF 743165 (to SK) and ERC starting grant PANDEMIC



668 101077853 (to TL), the Royal Society grant RSWF\RI\191011 and a Philip Leverhulme Prize from The  
669 Leverhulme Trust (to HAB), the EPSRC Doctoral Training Partnerships (DTP), and a Walter Benjamin  
670 Postdoctoral Fellowship from the German Research Council (to ACB). The funders had no role in study  
671 design, data collection and analysis, decision to publish, or preparation of the manuscript.  
672

### 673 **Data availability**

674 The authors confirm that all data underlying the findings are fully available without restriction. Files and  
675 code to perform the analyses described and to generate the plots presented are available as Supplementary  
676 Files, and in the git repository: [https://github.com/smlatorreo/mChr\\_Moryzae](https://github.com/smlatorreo/mChr_Moryzae) (Latorre 2024). Sequencing  
677 reads were deposited in the European Nucleotide Archive (ENA) under study accession number  
678 PRJEB6623 (mini-chromosome sequences from Italian rice blast isolates) and PRJEB67435 (Br62-  
679 sequencing). In addition, the Br62 whole-genome assembly is available under GenBank accession number  
680 PRJEB66723.  
681

### 682 **Author Contributions**

683 **Conceptualization:** ACB, SML, HAB, SK, TL.

684 **Formal analysis:** ACB, SML, AM, AH, JW, TL.

685 **Investigation:** ACB, SML, AM, AH, JW, YS, TL.

686 **Visualization:** ACB, SML, AM, TL.

687 **Coding:** ACB, SML, AM, TL.

688 **Supervision:** HAB, SK.

689 **Writing – original draft:** ACB.

690 **Writing – review & editing:** ACB, SML, HAB, SK and TL with contributions from all authors.

691 **Project administration:** ACB, SK.

692 **Funding acquisition:** ACB, HAB, SK, TL.

693

694 **Competing interests.** The authors have declared that no competing interests exist.

695

### 696 **References**

697 Ahmad SF, Martins C. 2019. The Modern View of B Chromosomes Under the Impact of High Scale  
698 Omics Analyses. *Cells* [Internet] 8. Available from: <http://dx.doi.org/10.3390/cells8020156>

699 Akagi Y, Akamatsu H, Otani H, Kodama M. 2009. Horizontal chromosome transfer, a mechanism for the  
700 evolution and differentiation of a plant-pathogenic fungus. *Eukaryot. Cell* 8:1732–1738.

701 Andrews S. 2010. FastQC: a quality control tool for high throughput sequence data.

702 Asuke S, Horie A, Komatsu K, Mori R, Vy TTP, Inoue Y, Jiang Y, Tatematsu Y, Shimizu M, Tosa Y. 2023.  
703 Loss of PWT7 located on a supernumerary chromosome is associated with parasitic specialization  
704 of *Pyricularia oryzae* on wheat. *Mol. Plant. Microbe. Interact.* [Internet]. Available from:  
705 <http://dx.doi.org/10.1094/MPMI-06-23-0078-R>

706 Aylward AJ, Petrus S, Mamerto A, Hartwick NT, Michael TP. 2023. PanKmer: k-mer based and  
707 reference-free pangenome analysis. *bioRxiv* [Internet]:2023.03.31.535143. Available from:  
708 <https://www.biorxiv.org/content/10.1101/2023.03.31.535143>

- 709 Badet T, Croll D. 2020. The rise and fall of genes: origins and functions of plant pathogen pangenomes.  
710 *Curr. Opin. Plant Biol.* 56:65–73.
- 711 Balesdent M-H, Fudal I, Ollivier B, Bally P, Grandaubert J, Eber F, Chèvre A-M, Leflon M, Rouxel T.  
712 2013. The dispensable chromosome of *Leptosphaeria maculans* shelters an effector gene conferring  
713 avirulence towards *Brassica rapa*. *New Phytol.* 198:887–898.
- 714 Barragan AC, Latorre SM, Mock PG, Harant A, Win J, Malmgren A, Burbano HA, Kamoun S, Langner T.  
715 2022. Wild grass isolates of *Magnaporthe* (Syn. *Pyricularia*) spp. from Germany can cause blast  
716 disease on cereal crops. *bioRxiv* [Internet]:2022.08.29.505667. Available from:  
717 <https://www.biorxiv.org/content/10.1101/2022.08.29.505667v1>
- 718 Barragan AC, Weigel D. 2021. Plant NLR diversity: the known unknowns of pan-NLRomes. *Plant Cell*  
719 33:814–831.
- 720 Barrett RDH, Schluter D. 2008. Adaptation from standing genetic variation. *Trends Ecol. Evol.* 23:38–44.
- 721 Barrett SCH. 2010. Understanding plant reproductive diversity. *Philos. Trans. R. Soc. Lond. B Biol. Sci.*  
722 365:99–109.
- 723 Bertazzoni S, Williams AH, Jones DA, Syme RA, Tan K-C, Hane JK. 2018. Accessories Make the Outfit:  
724 Accessory Chromosomes and Other Dispensable DNA Regions in Plant-Pathogenic Fungi. *Mol.*  
725 *Plant. Microbe. Interact.* 31:779–788.
- 726 Bhadauria V, MacLachlan R, Pozniak C, Cohen-Skalie A, Li L, Halliday J, Banniza S. 2019. Genetic map-  
727 guided genome assembly reveals a virulence-governing minichromosome in the lentil anthracnose  
728 pathogen *Colletotrichum lentis*. *New Phytol.* 221:431–445.
- 729 Bolger AM, Lohse M, Usadel B. 2014. Trimmomatic: a flexible trimmer for Illumina sequence data.  
730 *Bioinformatics* 30:2114–2120.
- 731 Bouckaert R, Heled J, Kühnert D, Vaughan T, Wu C-H, Xie D, Suchard MA, Rambaut A, Drummond AJ.  
732 2014. BEAST 2: a software platform for Bayesian evolutionary analysis. *PLoS Comput. Biol.*  
733 10:e1003537.
- 734 Cervenak F, Sepsiova R, Nosek J, Tomaska L. 2021. Step-by-Step Evolution of Telomeres: Lessons from  
735 Yeasts. *Genome Biol. Evol.* [Internet] 13. Available from: <http://dx.doi.org/10.1093/gbe/evaa268>
- 736 Chang CC, Chow CC, Tellier LC, Vattikuti S, Purcell SM, Lee JJ. 2015. Second-generation PLINK: rising  
737 to the challenge of larger and richer datasets. *Gigascience* 4:7.
- 738 Chiapello H, Mallet L, Guérin C, Aguilera G, Amselem J, Kroj T, Ortega-Abboud E, Lebrun M-H,  
739 Henrissat B, Gendraut A, et al. 2015. Deciphering Genome Content and Evolutionary Relationships  
740 of Isolates from the Fungus *Magnaporthe oryzae* Attacking Different Host Plants. *Genome Biol. Evol.*  
741 7:2896–2912.
- 742 Chuma I, Isobe C, Hotta Y, Ibaragi K, Futamata N, Kusaba M, Yoshida K, Terauchi R, Fujita Y,  
743 Nakayashiki H, et al. 2011. Multiple translocation of the AVR-Pita effector gene among  
744 chromosomes of the rice blast fungus *Magnaporthe oryzae* and related species. *PLoS Pathog.*  
745 7:e1002147.
- 746 Chung H, Goh J, Han S-S, Roh J-H, Kim Y, Heu S, Shim H-K, Jeong DG, Kang IJ, Yang J-W. 2020.  
747 Comparative Pathogenicity and Host Ranges of *Magnaporthe oryzae* and Related Species. *Plant*

- 748 *Pathol. J.* 36:305–313.
- 749 Couch BC, Fudal I, Lebrun M-H, Tharreau D, Valent B, van Kim P, Nottéghem J-L, Kohn LM. 2005.  
750 Origins of host-specific populations of the blast pathogen *Magnaporthe oryzae* in crop  
751 domestication with subsequent expansion of pandemic clones on rice and weeds of rice. *Genetics*  
752 170:613–630.
- 753 Covert SF. 1998. Supernumerary chromosomes in filamentous fungi. *Curr. Genet.* 33:311–319.
- 754 Crawford MS, Chumley FG, Weaver CG, Valent B. 1986. Characterization of the Heterokaryotic and  
755 Vegetative Diploid Phases of MAGNAPORTHE GRISEA. *Genetics* 114:1111–1129.
- 756 Croll D, McDonald BA. 2012. The accessory genome as a cradle for adaptive evolution in pathogens.  
757 *PLoS Pathog.* 8:e1002608.
- 758 Cruz CD, Valent B. 2017. Wheat blast disease: danger on the move. *Trop. Plant Pathol.* 42:210–222.
- 759 van Dam P, Fokkens L, Ayukawa Y, van der Gragt M, ter Horst A, Brankovics B, Houterman PM, Arie T,  
760 Rep M. 2017. A mobile pathogenicity chromosome in *Fusarium oxysporum* for infection of multiple  
761 cucurbit species. *Sci. Rep.* 7:1–15.
- 762 Danecek P, Bonfield JK, Liddle J, Marshall J, Ohan V, Pollard MO, Whitwham A, Keane T, McCarthy SA,  
763 Davies RM, et al. 2021. Twelve years of SAMtools and BCFtools. *Gigascience* [Internet] 10. Available  
764 from: <http://dx.doi.org/10.1093/gigascience/giab008>
- 765 Dong S, Raffaele S, Kamoun S. 2015. The two-speed genomes of filamentous pathogens: waltz with  
766 plants. *Curr. Opin. Genet. Dev.* 35:57–65.
- 767 Drenth A, McTaggart AR, Wingfield BD. 2019. Fungal clones win the battle, but recombination wins the  
768 war. *IMA Fungus* 10:18.
- 769 Drummond AJ, Rambaut A, Shapiro B, Pybus OG. 2005. Bayesian coalescent inference of past  
770 population dynamics from molecular sequences. *Mol. Biol. Evol.* 22:1185–1192.
- 771 Durand EY, Patterson N, Reich D, Slatkin M. 2011. Testing for ancient admixture between closely  
772 related populations. *Mol. Biol. Evol.* 28:2239–2252.
- 773 Dylus D, Altenhoff A, Majidian S, Sedlazeck FJ, Dessimoz C. 2024. Inference of phylogenetic trees  
774 directly from raw sequencing reads using Read2Tree. *Nat. Biotechnol.* 42:139–147.
- 775 Fitzpatrick DA. 2012. Horizontal gene transfer in fungi. *FEMS Microbiol. Lett.* 329:1–8.
- 776 Gabaldón T. 2020. Patterns and impacts of nonvertical evolution in eukaryotes: a paradigm shift. *Ann. N.*  
777 *Y. Acad. Sci.* 1476:78–92.
- 778 Gel B, Serra E. 2017. karyoploteR: an R/Bioconductor package to plot customizable genomes displaying  
779 arbitrary data. *Bioinformatics* 33:3088–3090.
- 780 Gladieux P, Condon B, Ravel S, Soanes D, Maciel JLN, Nhani A Jr, Chen L, Terauchi R, Lebrun M-H,  
781 Tharreau D, et al. 2018. Gene Flow between Divergent Cereal- and Grass-Specific Lineages of the  
782 Rice Blast Fungus *Magnaporthe oryzae*. *MBio* [Internet] 9. Available from:  
783 <http://dx.doi.org/10.1128/mBio.01219-17>

- 784 Gladieux P, Ravel S, Rieux A, Cros-Arteil S, Adreit H, Milazzo J, Thierry M, Fournier E, Terauchi R,  
785 Tharreau D. 2018. Coexistence of Multiple Endemic and Pandemic Lineages of the Rice Blast  
786 Pathogen. *MBio* [Internet] 9. Available from: <http://dx.doi.org/10.1128/mBio.01806-17>
- 787 Green RE, Krause J, Briggs AW, Maricic T, Stenzel U, Kircher M, Patterson N, Li H, Zhai W, Fritz MH-  
788 Y, et al. 2010. A draft sequence of the Neandertal genome. *Science* 328:710–722.
- 789 Gu Z, Gu L, Eils R, Schlesner M, Brors B. 2014. circlize Implements and enhances circular visualization in  
790 R. *Bioinformatics* 30:2811–2812.
- 791 Gyawali N, Hao Y, Lin G, Huang J, Bika R, Daza LC, Zheng H, Cruppe G, Caragea D, Cook D, et al.  
792 2023. Using recurrent neural networks to detect supernumerary chromosomes in fungal strains  
793 causing blast diseases. *bioRxiv* [Internet]:2023.09.17.558148. Available from:  
794 <https://www.biorxiv.org/content/10.1101/2023.09.17.558148v1>
- 795 Habig M, Grasse AV, Mueller J, Stukenbrock EH, Leitner H, Cremer S. 2023. Frequent horizontal  
796 chromosome transfer between asexual fungal insect pathogens. *bioRxiv*  
797 [Internet]:2023.09.18.558174. Available from:  
798 <https://www.biorxiv.org/content/10.1101/2023.09.18.558174v1>
- 799 Habig M, Quade J, Stukenbrock EH. 2017. Forward Genetics Approach Reveals Host Genotype-  
800 Dependent Importance of Accessory Chromosomes in the Fungal Wheat Pathogen *Zymoseptoria*  
801 *tritici*. *MBio* [Internet] 8. Available from: <http://dx.doi.org/10.1128/mBio.01919-17>
- 802 Han Y, Liu X, Benny U, Kistler HC, VanEtten HD. 2001. Genes determining pathogenicity to pea are  
803 clustered on a supernumerary chromosome in the fungal plant pathogen *Nectria haematococca*.  
804 *Plant J.* 25:305–314.
- 805 He C, Rusu AG, Poplawski AM, Irwin JA, Manners JM. 1998. Transfer of a supernumerary chromosome  
806 between vegetatively incompatible biotypes of the fungus *Colletotrichum gloeosporioides*. *Genetics*  
807 150:1459–1466.
- 808 Henry PM, Pincot DDA, Jenner BN, Borrero C, Aviles M, Nam M-H, Epstein L, Knapp SJ, Gordon TR.  
809 2021. Horizontal chromosome transfer and independent evolution drive diversification in *Fusarium*  
810 *oxysporum* f. sp. *fragariae*. *New Phytol.* 230:327–340.
- 811 Huang J, Liu S, Cook DE. 2023. Dynamic Genomes - Mechanisms and consequences of genomic diversity  
812 impacting plant-fungal interactions. *Physiol. Mol. Plant Pathol.* 125:102006.
- 813 Huson DH, Bryant D. 2006. Application of phylogenetic networks in evolutionary studies. *Mol. Biol. Evol.*  
814 23:254–267.
- 815 Hyon G-S, Nga NTT, Chuma I, Inoue Y, Asano H, Murata N, Kusaba M, Tosa Y. 2012. Characterization  
816 of interactions between barley and various host-specific subgroups of *Magnaporthe oryzae* and *M.*  
817 *grisea*. *J. Gen. Plant Pathol.* 78:237–246.
- 818 Ishikawa FH, Barcelos QL, Alves E, Camargo OA Jr, de Souza EA. 2010. Symptoms and prepenetration  
819 events associated with the infection of common bean by the anamorph and teleomorph  
820 of *Glomerella cingulata* f. sp. *Phaseoli*. *J. Phytopathol.* 158:270–277.
- 821 Islam T, Ansary MWR, Rahman MM. 2023. *Magnaporthe oryzae* and Its Pathotypes: A Potential Plant  
822 Pandemic Threat to Global Food Security. In: Scott B, Mesarich C, editors. *Plant Relationships:*

- 823 Fungal-Plant Interactions. Cham: Springer International Publishing. p. 425–462.
- 824 Jones A, Torkel C, Stanley D, Nasim J, Borevitz J, Schwessinger B. 2021. High-molecular weight DNA  
825 extraction, clean-up and size selection for long-read sequencing. *PLoS One* 16:e0253830.
- 826 Kahle D, Wickham H. 2013. ggmap: Spatial Visualization with ggplot2. *R J.* 5:144–161.
- 827 Kato H, Yamamoto M, Yamaguchi-Ozaki T, Kadouchi H, Iwamoto Y, Nakayashiki H, Tosa Y, Mayama S,  
828 Mori N. 2000. Pathogenicity, Mating Ability and DNA Restriction Fragment Length Polymorphisms  
829 of *Pyricularia* Populations Isolated from Gramineae, Bambusideae and Zingiberaceae Plants. *J. Gen.*  
830 *Plant Pathol.* 66:30–47.
- 831 Kistler CH. 1996. Mutants of *Nectria haematococca* Created by a site-directed chromosome breakage  
832 are greatly reduced in virulence toward pea. *Mol. Plant. Microbe. Interact.* 9:804.
- 833 Kobayashi N, Dang TA, Kieu PTM, Gómez Luciano LB, Van Ba V, Izumitsu K, Shimizu M, Ikeda K-I, Li  
834 W-H, Nakayashiki H. 2023. Horizontally transferred DNA in the genome of the fungus *Pyricularia*  
835 *oryzae* is associated with repressive histone modifications. *Mol. Biol. Evol.* [Internet]. Available from:  
836 <http://dx.doi.org/10.1093/molbev/msad186>
- 837 Kolmogorov M, Yuan J, Lin Y, Pevzner PA. 2019. Assembly of long, error-prone reads using repeat  
838 graphs. *Nat. Biotechnol.* 37:540–546.
- 839 Koren S, Walenz BP, Berlin K, Miller JR, Bergman NH, Phillippy AM. 2017. Canu: scalable and accurate  
840 long-read assembly via adaptive k-mer weighting and repeat separation. *Genome Res.* 27:722–736.
- 841 Kumar S, Stecher G, Li M, Knyaz C, Tamura K. 2018. MEGA X: Molecular Evolutionary Genetics  
842 Analysis across Computing Platforms. *Mol. Biol. Evol.* 35:1547–1549.
- 843 Kusaba M, Mochida T, Naridomi T, Fujita Y, Chuma I, Tosa Y. 2014. Loss of a 1.6 Mb chromosome in  
844 *Pyricularia oryzae* harboring two alleles of *AvrPik* leads to acquisition of virulence to rice cultivars  
845 containing resistance alleles at the *Pik* locus. *Curr. Genet.* 60:315–325.
- 846 Langner T, Harant A, Gomez-Luciano LB, Shrestha RK, Malmgren A, Latorre SM, Burbano HA, Win J,  
847 Kamoun S. 2021. Genomic rearrangements generate hypervariable mini-chromosomes in host-  
848 specific isolates of the blast fungus. *PLoS Genet.* 17:e1009386.
- 849 Langner T, Harant A, Kamoun S. 2019. Isolation of supernumerary mini-chromosomes from fungi for  
850 enrichment sequencing v1. Available from: [https://www.protocols.io/view/isolation-of-](https://www.protocols.io/view/isolation-of-supernumerary-mini-chromosomes-from-f-9t7h6rn)  
851 [supernumerary-mini-chromosomes-from-f-9t7h6rn](https://www.protocols.io/view/isolation-of-supernumerary-mini-chromosomes-from-f-9t7h6rn)
- 852 Latorre SM. 2024. [smlatorreo/mChr\\_Moryzae: mChr\\_Moryzae](https://zenodo.org/doi/10.5281/zenodo.10628812). Available from:  
853 <https://zenodo.org/doi/10.5281/zenodo.10628812>
- 854 Latorre SM, Langner T, Malmgren A, Win J, Kamoun S, Burbano HA. 2022. SNP calling parameters have  
855 minimal impact on population structure and divergence time estimates for the rice blast fungus.  
856 *bioRxiv* [Internet]:2022.03.06.482794. Available from:  
857 <https://www.biorxiv.org/content/10.1101/2022.03.06.482794>
- 858 Latorre SM, Reyes-Avila CS, Malmgren A, Win J, Kamoun S, Burbano HA. 2020. Differential loss of  
859 effector genes in three recently expanded pandemic clonal lineages of the rice blast fungus. *BMC*  
860 *Biol.* 18:88.



- 861 Latorre SM, Were VM, Foster AJ, Langner T, Malmgren A, Harant A, Asuke S, Reyes-Avila S, Gupta DR,  
862 Jensen C, et al. 2023. Genomic surveillance uncovers a pandemic clonal lineage of the wheat blast  
863 fungus. *PLoS Biol.* 21:e3002052.
- 864 Letunic I, Bork P. 2021. Interactive Tree Of Life (iTOL) v5: an online tool for phylogenetic tree display  
865 and annotation. *Nucleic Acids Res.* 49:W293–W296.
- 866 Li H. 2013. Aligning sequence reads, clone sequences and assembly contigs with BWA-MEM. *arXiv [q-  
867 bio.GN]* [Internet]. Available from: <http://arxiv.org/abs/1303.3997>
- 868 Liu S, Lin G, Ramachandran SR, Cruppe G, Cook D, Pedley KF, Valent B. 2022. Rapid mini-chromosome  
869 divergence among fungal isolates causing wheat blast outbreaks in Bangladesh and Zambia. *bioRxiv*  
870 [Internet]:2022.06.18.496690. Available from:  
871 <https://www.biorxiv.org/content/10.1101/2022.06.18.496690.full>
- 872 Ma L-J, van der Does HC, Borkovich KA, Coleman JJ, Daboussi M-J, Di Pietro A, Dufresne M, Freitag M,  
873 Grabherr M, Henrissat B, et al. 2010. Comparative genomics reveals mobile pathogenicity  
874 chromosomes in *Fusarium*. *Nature* 464:367–373.
- 875 Marçais G, Delcher AL, Phillippy AM, Coston R, Salzberg SL, Zimin A. 2018. MUMmer4: A fast and  
876 versatile genome alignment system. *PLoS Comput. Biol.* 14:e1005944.
- 877 Masel AM, He C, Poplawski AM, Irwin JAG, Manners JM. 1996. Molecular evidence for chromosome  
878 transfer between biotypes of *Colletotrichum gloeosporioides*. *Mol. Plant. Microbe. Interact.*  
879 [Internet]. Available from: <https://agris.fao.org/agris-search/search.do?recordID=US9632088>
- 880 McCarthy CGP, Fitzpatrick DA. 2019. Pan-genome analyses of model fungal species. *Microb Genom*  
881 [Internet] 5. Available from: <http://dx.doi.org/10.1099/mgen.0.000243>
- 882 McKenna A, Hanna M, Banks E, Sivachenko A, Cibulskis K, Kernytsky A, Garimella K, Altshuler D,  
883 Gabriel S, Daly M, et al. 2010. The Genome Analysis Toolkit: a MapReduce framework for analyzing  
884 next-generation DNA sequencing data. *Genome Res.* 20:1297–1303.
- 885 Mehrabi R, Bahkali AH, Abd-Elsalam KA, Moslem M, Ben M'barek S, Gohari AM, Jashni MK,  
886 Stergiopoulos I, Kema GHJ, de Wit PJGM. 2011. Horizontal gene and chromosome transfer in plant  
887 pathogenic fungi affecting host range. *FEMS Microbiol. Rev.* 35:542–554.
- 888 Mela AP, Rico-Ramírez AM, Glass NL. 2020. Syncytia in Fungi. *Cells* [Internet] 9. Available from:  
889 <http://dx.doi.org/10.3390/cells9102255>
- 890 Miao VP, Covert SF, VanEtten HD. 1991. A fungal gene for antibiotic resistance on a dispensable (“B”)  
891 chromosome. *Science* 254:1773–1776.
- 892 Miller MA, Pfeiffer W, Schwartz T. 2010. Creating the CIPRES Science Gateway for inference of large  
893 phylogenetic trees. In: 2010 Gateway Computing Environments Workshop (GCE). IEEE. p. 1–8.
- 894 Minh BQ, Schmidt HA, Chernomor O, Schrempf D, Woodhams MD, von Haeseler A, Lanfear R. 2020.  
895 IQ-TREE 2: New Models and Efficient Methods for Phylogenetic Inference in the Genomic Era. *Mol.*  
896 *Biol. Evol.* 37:1530–1534.
- 897 Mohanta TK, Bae H. 2015. The diversity of fungal genome. *Biol. Proced. Online* 17:8.
- 898 Möller M, Stukenbrock EH. 2017. Evolution and genome architecture in fungal plant pathogens. *Nat. Rev.*

- 899 *Microbiol.* 15:756–771.
- 900 Monsur MA, Kusaba M. 2018. Study on Parasexual Recombination between *Pyricularia oryzae* and  
901 *Pyricularia grisea*. *Agric. Sci. China* 9:317–339.
- 902 Moolhuijzen PM, See PT, Shi G, Powell HR, Cockram J, Jørgensen LN, Benslimane H, Strelkov SE,  
903 Turner J, Liu Z, et al. 2022. A global pangenome for the wheat fungal pathogen *Pyrenophora tritici-*  
904 *repentis* and prediction of effector protein structural homology. *Microb Genom* [Internet] 8.  
905 Available from: <http://dx.doi.org/10.1099/mgen.0.000872>
- 906 Nei M. 2007. The new mutation theory of phenotypic evolution. *Proc. Natl. Acad. Sci. U. S. A.* 104:12235–  
907 12242.
- 908 Nieuwenhuis BPS, James TY. 2016. The frequency of sex in fungi. *Philos. Trans. R. Soc. Lond. B Biol. Sci.*  
909 [Internet] 371. Available from: <http://dx.doi.org/10.1098/rstb.2015.0540>
- 910 Noguchi MT, Yasuda N, Fujita Y. 2006. Evidence of Genetic Exchange by Parasexual Recombination and  
911 Genetic Analysis of Pathogenicity and Mating Type of Parasexual Recombinants in Rice Blast Fungus,  
912 *Magnaporthe oryzae*. *Phytopathology* 96:746–750.
- 913 Oggenfuss U, Feurtey A, Reyes-Avila CS, Gluck-Thaler E, Puccetti G, Glad HM, Abraham LN, Stalder L,  
914 Tralamazza SM, González-Sáyer SM, et al. 2023. Genome Evolution in Fungal Plant Pathogens: From  
915 Populations to Kingdom-Wide Dynamics. In: Pöggeler S, James T, editors. *Evolution of Fungi and*  
916 *Fungal-Like Organisms*. Cham: Springer International Publishing. p. 103–121.
- 917 Orbach MJ, Chumley FG, Valent B. 1996. Electrophoretic karyotypes of *Magnaporthe grisea* pathogens  
918 of diverse grasses. *MPMI-Molecular Plant Microbe Interactions* 9:261–271.
- 919 Peng Z, Oliveira-Garcia E, Lin G, Hu Y, Dalby M, Migeon P, Tang H, Farman M, Cook D, White FF, et al.  
920 2019. Effector gene reshuffling involves dispensable mini-chromosomes in the wheat blast fungus.  
921 *PLoS Genet.* 15:e1008272.
- 922 Petersen C, Sørensen T, Nielsen MR, Sondergaard TE, Sørensen JL, Fitzpatrick DA, Frisvad JC, Nielsen  
923 KL. 2023. Comparative genomic study of the *Penicillium* genus elucidates a diverse pangenome and  
924 15 lateral gene transfer events. *IMA Fungus* 14:3.
- 925 Potgieter L, Feurtey A, Dutheil JY, Stukenbrock EH. 2020. On Variant Discovery in Genomes of Fungal  
926 Plant Pathogens. *Front. Microbiol.* 11:626.
- 927 Quinlan AR, Hall IM. 2010. BEDTools: a flexible suite of utilities for comparing genomic features.  
928 *Bioinformatics* 26:841–842.
- 929 Rahman MT, Sobur MA, Islam MS, Levy S, Hossain MJ, El Zowalaty ME, Rahman AT, Ashour HM. 2020.  
930 Zoonotic Diseases: Etiology, Impact, and Control. *Microorganisms* [Internet] 8. Available from:  
931 <http://dx.doi.org/10.3390/microorganisms8091405>
- 932 Rahnema M, Novikova O, Starnes JH, Zhang S, Chen L, Farman ML. 2020. Transposon-mediated  
933 telomere destabilization: a driver of genome evolution in the blast fungus. *Nucleic Acids Res.*  
934 48:7197–7217.
- 935 Roca MG, Artl J, Jeffree CE, Read ND. 2005. Cell biology of conidial anastomosis tubes in *Neurospora*  
936 *crassa*. *Eukaryot. Cell* 4:911–919.

- 937 Roca MG, Davide LC, Mendes-Costa MC, Wheals A. 2003. Conidial anastomosis tubes in  
938 *Colletotrichum*. *Fungal Genet. Biol.* 40:138–145.
- 939 Roper M, Ellison C, Taylor JW, Glass NL. 2011. Nuclear and genome dynamics in multinucleate  
940 ascomycete fungi. *Curr. Biol.* 21:R786–R793.
- 941 Sagulenko P, Puller V, Neher RA. 2018. TreeTime: Maximum-likelihood phylodynamic analysis. *Virus Evol*  
942 4:vex042.
- 943 Sahu N, Indic B, Wong-Bajracharya J, Merényi Z, Ke H-M, Ahrendt S, Monk T-L, Kocsubé S, Drula E,  
944 Lipzen A, et al. 2023. Vertical and horizontal gene transfer shaped plant colonization and biomass  
945 degradation in the fungal genus *Armillaria*. *Nat Microbiol* [Internet]. Available from:  
946 <http://dx.doi.org/10.1038/s41564-023-01448-1>
- 947 Saleh D, Xu P, Shen Y, Li C, Adreit H, Milazzo J, Ravigné V, Bazin E, Nottéghem J-L, Fournier E, et al.  
948 2012. Sex at the origin: an Asian population of the rice blast fungus *Magnaporthe oryzae*  
949 reproduces sexually. *Mol. Ecol.* 21:1330–1344.
- 950 Schubert M, Lindgreen S, Orlando L. 2016. AdapterRemoval v2: rapid adapter trimming, identification,  
951 and read merging. *BMC Res. Notes* 9:88.
- 952 Scrucca L, Fraley C, Murphy TB, Raftery AE. 2023. Model-Based Clustering, Classification, and Density  
953 Estimation Using mclust in R. Chapman and Hall/CRC
- 954 Seidl MF, Thomma BPHJ. 2014. Sex or no sex: evolutionary adaptation occurs regardless. *Bioessays*  
955 36:335–345.
- 956 Simão FA, Waterhouse RM, Ioannidis P, Kriventseva EV, Zdobnov EM. 2015. BUSCO: assessing genome  
957 assembly and annotation completeness with single-copy orthologs. *Bioinformatics* 31:3210–3212.
- 958 Skoglund P, Mallick S, Bortolini MC, Chennagiri N, Hünemeier T, Petzl-Erler ML, Salzano FM, Patterson  
959 N, Reich D. 2015. Genetic evidence for two founding populations of the Americas. *Nature* 525:104–  
960 108.
- 961 Soanes D, Richards TA. 2014. Horizontal gene transfer in eukaryotic plant pathogens. *Annu. Rev.*  
962 *Phytopathol.* 52:583–614.
- 963 Stukenbrock EH. 2013. Evolution, selection and isolation: a genomic view of speciation in fungal plant  
964 pathogens. *New Phytol.* 199:895–907.
- 965 Stukenbrock EH. 2016. The Role of Hybridization in the Evolution and Emergence of New Fungal Plant  
966 Pathogens. *Phytopathology* 106:104–112.
- 967 Sun D. 2018. Pull in and Push Out: Mechanisms of Horizontal Gene Transfer in Bacteria. *Frontiers in*  
968 *Microbiology* [Internet] 9. Available from: <http://dx.doi.org/10.3389/fmicb.2018.02154>
- 969 Takeuchi N, Kaneko K, Koonin EV. 2014. Horizontal gene transfer can rescue prokaryotes from  
970 Muller’s ratchet: benefit of DNA from dead cells and population subdivision. *G3* 4:325–339.
- 971 Talbot NJ, Salch YP, Ma M, Hamer JE. 1993. Karyotypic Variation within Clonal Lineages of the Rice  
972 Blast Fungus, *Magnaporthe grisea*. *Appl. Environ. Microbiol.* 59:585–593.
- 973 Thierry M, Charriat F, Milazzo J, Adreit H, Ravel S, Cros-Arteil S, Borron S, Sella V, Kroj T, loos R, et al.

- 974 2022. Maintenance of divergent lineages of the Rice Blast Fungus *Pyricularia oryzae* through niche  
975 separation, loss of sex and post-mating genetic incompatibilities. *PLoS Pathog.* 18:e1010687.
- 976 Torres DE, Oggenfuss U, Croll D, Seidl MF. 2020. Genome evolution in fungal plant pathogens: looking  
977 beyond the two-speed genome model. *Fungal Biol. Rev.* 34:136–143.
- 978 Tsujimoto Noguchi M. 2011. Parasexual recombination in *Magnaporthe oryzae*. *Jpn. Agric. Res. Q.* 45:39–  
979 45.
- 980 Vangalis V, Knop M, Typas MA, Papaioannou IA. 2021. Establishment of conidial fusion in the asexual  
981 fungus *Verticillium dahliae* as a useful system for the study of non-sexual genetic interactions. *Curr.*  
982 *Genet.* 67:471–485.
- 983 Van Valen L. 1973. Patterns and the balance of nature. *Evolutionary Theory* 1:31–49.
- 984 Vaser R, Sović I, Nagarajan N, Šikić M. 2017. Fast and accurate de novo genome assembly from long  
985 uncorrected reads. *Genome Res.* 27:737–746.
- 986 Vlaardingerbroek I, Beerens B, Rose L, Fokkens L, Cornelissen BJC, Rep M. 2016. Exchange of core  
987 chromosomes and horizontal transfer of lineage-specific chromosomes in *Fusarium oxysporum*.  
988 *Environ. Microbiol.* 18:3702–3713.
- 989 Walker BJ, Abeel T, Shea T, Priest M, Abouelliel A, Sakthikumar S, Cuomo CA, Zeng Q, Wortman J,  
990 Young SK, et al. 2014. Pilon: an integrated tool for comprehensive microbial variant detection and  
991 genome assembly improvement. *PLoS One* 9:e112963.
- 992 van Westerhoven A, Aguilera-Galvez C, Nakasato-Tagami G, Shi-Kunne X, Dijkstra J, de la Parte EM,  
993 Carero EC, Meijer H, Feurtey A, Maryani N, et al. 2023. Segmental Duplications Drive the  
994 Evolution of Accessory Regions in a Major Crop Pathogen. *bioRxiv* [Internet]:2023.06.07.544053.  
995 Available from: <https://www.biorxiv.org/content/10.1101/2023.06.07.544053v1?ct=>
- 996 Wickham H. 2009. *ggplot2: Elegant Graphics for Data Analysis*. Springer Science & Business Media
- 997 Win J, Harant A, Malmgren A, Langner T, Shrestha R-K, Latorre SM, Were V, Talbot NJ, Burbano HA,  
998 Picco AM, et al. 2020. Large scale genome assemblies of *Magnaporthe oryzae* rice isolates from  
999 Italy. Available from: <https://zenodo.org/record/4326823>
- 1000 Wright S. 1951. The genetical structure of populations. *Ann. Eugen.* 15:323–354.
- 1001 Younas MU, Wang G, Du H, Zhang Y, Ahmad I, Rajput N, Li M, Feng Z, Hu K, Khan NU, et al. 2023.  
1002 Approaches to Reduce Rice Blast Disease Using Knowledge from Host Resistance and Pathogen  
1003 Pathogenicity. *Int. J. Mol. Sci.* [Internet] 24. Available from: <http://dx.doi.org/10.3390/ijms24054985>
- 1004 Zeigler RS, Scott RP, Leung H, Bordeos AA, Kumar J, Nelson RJ. 1997. Evidence of parasexual exchange  
1005 of DNA in the rice blast fungus challenges its exclusive clonality. *Phytopathology* 87:284–294.
- 1006 Zielezinski A, Vinga S, Almeida J, Karlowski WM. 2017. Alignment-free sequence comparison: benefits,  
1007 applications, and tools. *Genome Biol.* 18:186.
